# Supplementary material for: An engineered small ligand activates NK cells and triggers their cytolytic activity
Source: Research Square preprint supplement (doi:10.21203/rs.3.rs-5290318/v1), 2024-10-21

**Supporting Information**

**An engineered small ligand activates NK cells and triggers their cytolytic activity**

Pedro F. Pinheiro1,2,3*, Joana P. Miranda4, M. Matilde Marques1,3 and Gonçalo C. Justino1,2*

1 – Centro de Química Estrutural – Institute of Molecular Sciences, Instituto Superior Técnico, Universidade de Lisboa, 1049-001 Lisboa, Portugal

2 – Escola Superior de Tecnologia do Barreiro, Instituto Politécnico de Setúbal, 2839-001 Lavradio, Portugal

3 – Departamento de Engenharia Química, Instituto Superior Técnico, Universidade de Lisboa, 1049-001 Lisboa, Portugal

4 – Research Institute for Medicines, Faculdade de Farmácia, Universidade de Lisboa, 1649-003 Lisboa, Portugal

* Correspondence to: pedro.pinheiro@tecnico.ulisboa.pt, goncalo.justino@tecnico.ulisboa.pt

**Contents**

Supplemental Results S-2

*Synthetic procedures and compounds characterization* S-7

*Reaction monitoring* S-7

*Preparative chromatography* S-8

*Melting point* S-8

*UV-VIS and fluorescence spectroscopy* S-8

*NMR spectroscopy* S-8

*Mass spectrometry* S-9

*Solvolysis studies* S-10

Synthesis and characterization S-10

References S-36

NMR spectra S-37

# Supplemental Results

**Table S1. Virtual screening top 10 hit compounds.**

|  | **Structure** | **Binding energy (kcal/mol)** |
| --- | --- | --- |
| **S1 = 1** |  | **-10.3** |
| **S2** |  | **-10.2** |
| **S3 = 2** |  | **-10.1** |
| **S4** |  | **-10.0** |
| **S5** |  | **-10.0** |
| **S6** |  | **-10.0** |
| **S7** |  | **-9.90** |
| **S8 = 3** |  | **-9.90** |
| **S9** |  | **-9.80** |
| **S10** |  | **-9.80** |

**Table S2. Structural variations in the R1 terminal group used in docking simulations to establish the preferential substituents.**

| **Common core** | | | | | | | |
| --- | --- | --- | --- | --- | --- | --- | --- |
| **R1** | | | | | | | |
| Type A |  | ***X*** | ***Y*** | ***Z*** | ***W*** | ***J*** | ***#*** |
| H  CH3  H  H  CH3  Cl  H  H  NO2  H  H  H  H  OH  H  H  H  H  H  H  H  H  H  H  H | H  H  CH3  H  H  H  Cl  H  H  NO2  H  NO2  Cl  H  OH  H  OCH3  OCH3  OCH3  NH2  N(CH3)2  N+(CH3)3  COOH  COO-  COOCH3 | H  H  H  CH3  CH3  H  H  Cl  H  H  NO2  H  H  H  H  OH  H  H  OCH3  H  H  H  H  H  H | H  H  H  H  H  H  H  H  H  H  H  NO2  Cl  H  H  H  H  OCH3  H  H  H  H  H  H  H | H  H  H  H  CH3  H  H  H  H  H  H  H  H  H  H  H  H  H  H  H  H  H  H  H  H | **S11 = 4 = 13a**  **S13 = 5**  **S14**  **S15**  **S16**  **S17 = 6**  **S18 = 8 = 13b**  **S19**  **S20 = 7**  **S21**  **S22**  **S23 = 9 = 13c**  **S24 = 10**  **S25**  **S26**  **S27**  **S28**  **S29**  **S30**  **S31**  **S32**  **S33**  **S34**  **S35**  **S36** |
| Type B |  | O  O  O  NH  NH  NH | H  CH3  H  H  CH3  H | H  H  CH3  H  H  CH3 | -  -  -  -  -  - | -  -  -  -  -  - | **S37**  **S38**  **S39**  **S40**  **S41**  **S42** |
| Type C |  | O  O  O | H  CH3  COCH3 | -  -  - | -  -  - | -  -  - | **S43 = 13d**  **S44**  **S45** |
| Type D |  | O  O  NH  NCH3 | H  COCH3  H  H | -  -  -  - | -  -  -  - | -  -  -  - | **S46**  **S47**  **S48**  **S49 = 13e** |
| Type E |  | CH  N  CH  N | CH  CH  N  N | -  -  -  - | -  -  -  - | -  -  -  - | **S50 = 13f**  **S51**  **S52**  **S53** |
| Type F |  | O  NH  NCH3  S | -  -  -  - | -  -  -  - | -  -  -  - | -  -  -  - | **S54**  **S55**  **S56**  **S57** |
| Type G |  | O  NH | -  - | -  - | -  - | -  - | **S58 = 13g**  **S59** |
| Type H |  | H  CH3  CH2CH3  Cl  CH2Cl | -  -  -  -  - | -  -  -  -  - | -  -  -  -  - | -  -  -  -  - | **S60**  **S61**  **S62**  **S63**  **S64** |

**
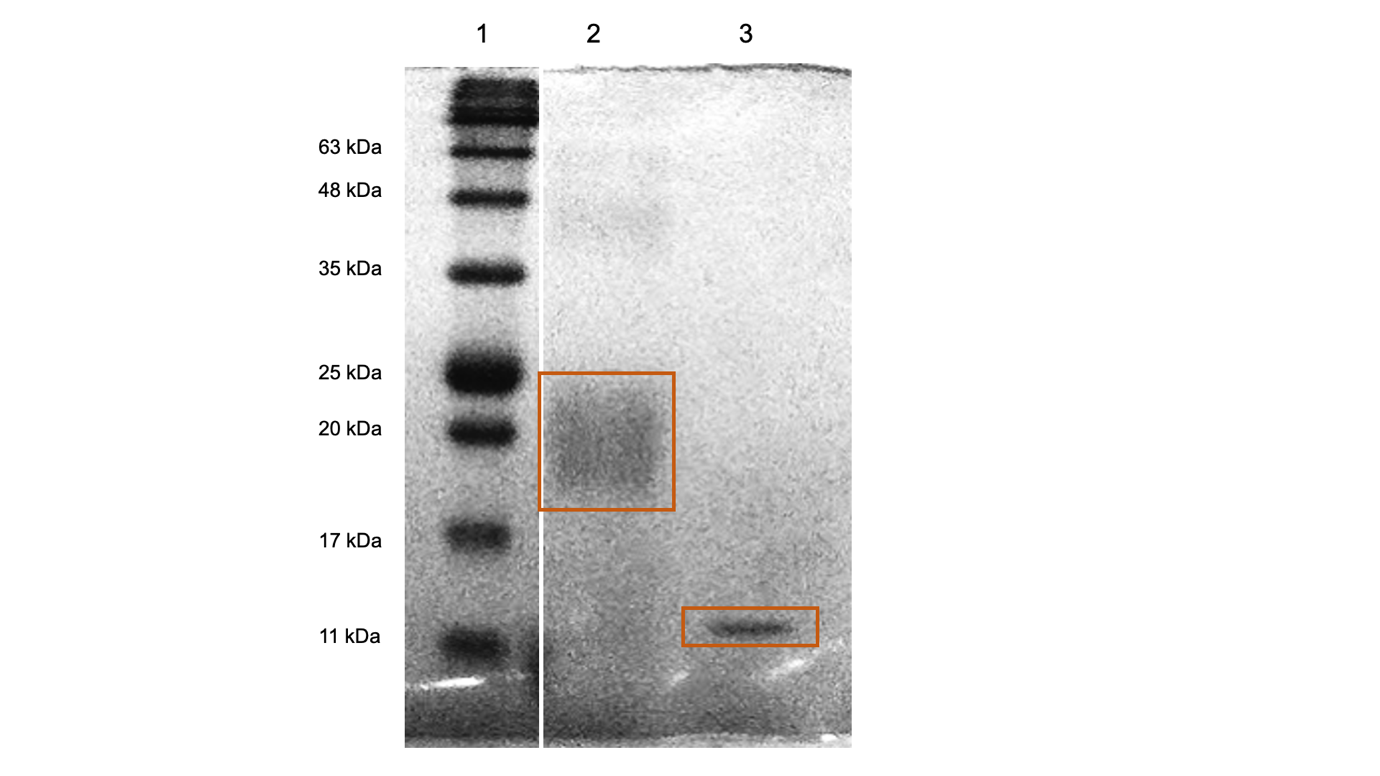
**

**Fig. S1. Molecular weight analysis of rhNKp30 and rhNKp30deglyc.** 15% SDS-PAGE analysis of rhNKp30 before and after treatment with PNGase F, under reducing conditions. Lane 1: protein marker; lane 2: rhNKp30 from commercial source; lane 3: PNGase F-treated rhNKp30. Calculated molecular weights are 18.5-24.4 kDa for glycosylated rhNKp30 and 12.0 kDa for PNGase F-treated rhNKp30 (rhNKp30deglyc).

**
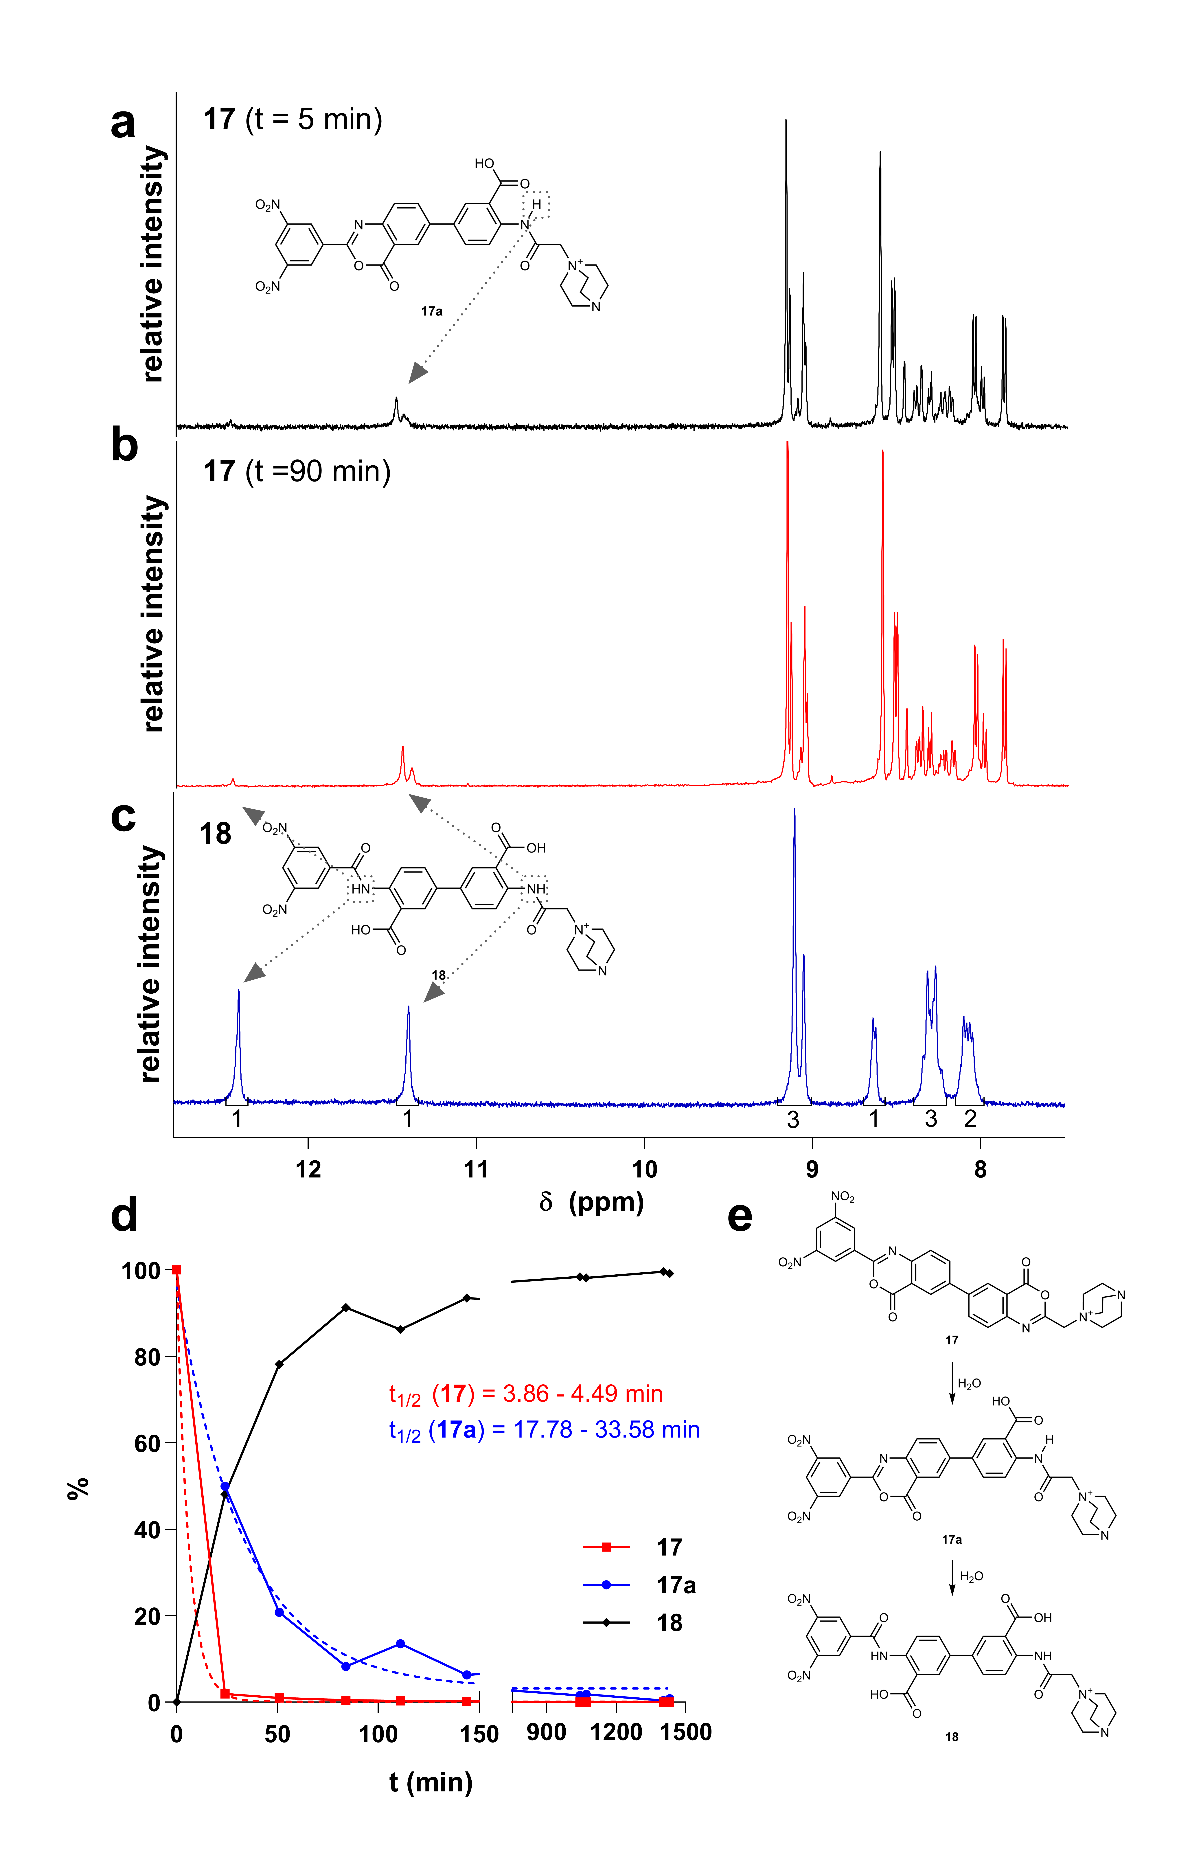
**

**Fig. S2. Hydrolysis of compound 17 and 18.** 1H NMR study of the solvolysis of compound **17** (2 mM in DMSO-*d6*) diluted with 1 vol of D2O; spectra were acquired at **a,** 5 min, and **b**, 90 min post-dilution. **c**,1H NMR of compound **18** in the same conditions at 90 min post-dilution for amide proton assignment confirmation. Spectra recorded at 500 MHz with the probe heater set to a sample temperature of 37 ⁰C. All spectra were referenced to the signal of DMSO-*d6* (2.5 ppm). Indicated half-lives are the 95 % confidence interval limits (**17**, r2 = 0.999; **18**, r2 = 0.9879). **d**, the hydrolysis of **17** occurs in two steps, first on the less hindered DABCO-substituted benzoxazinone group, yielding **17a**, and then on the other benzoxazinone moiety, generating **18**.

**
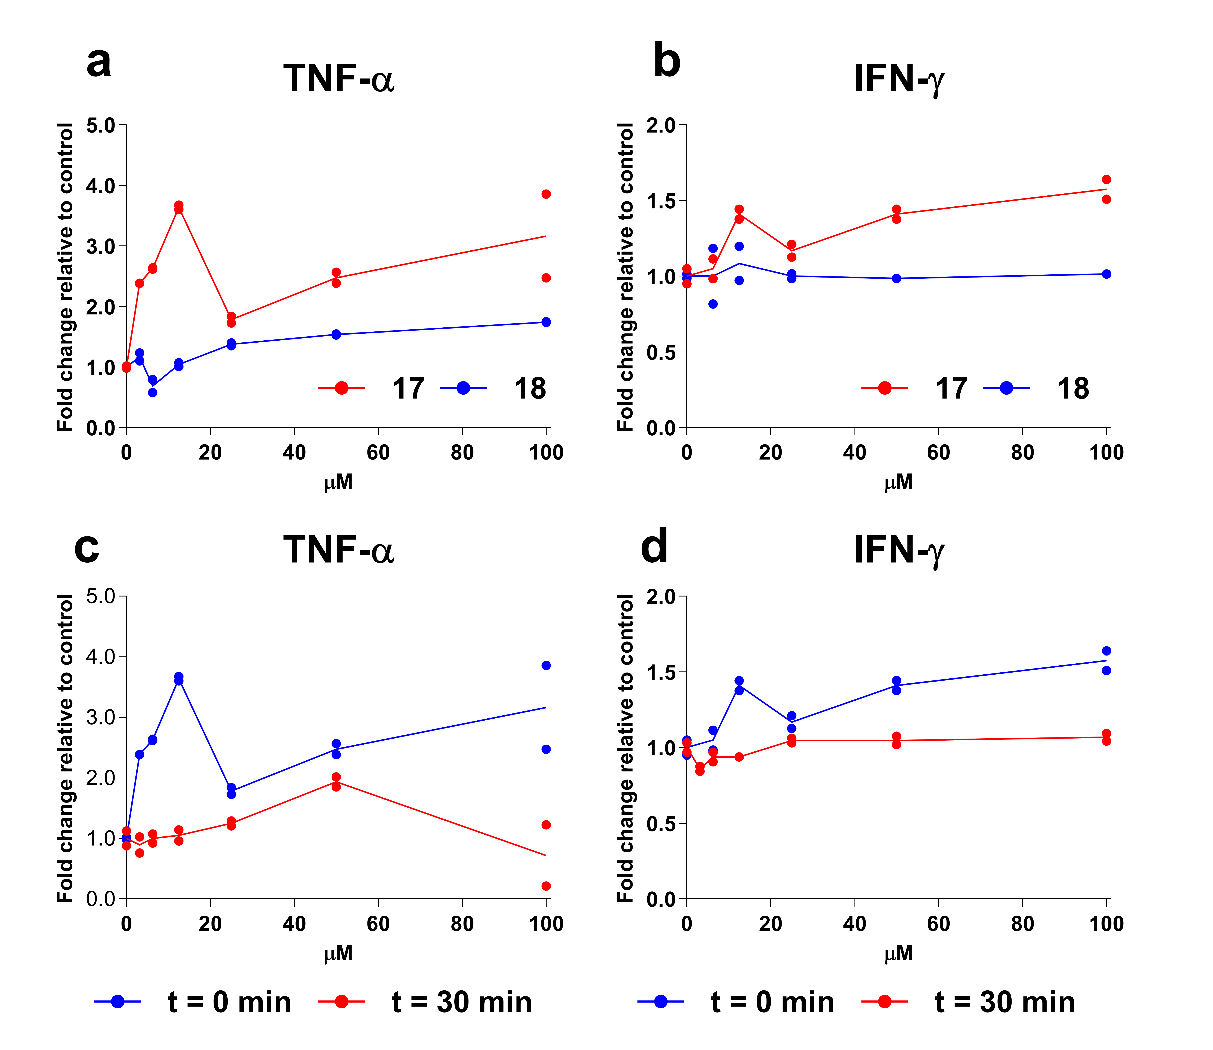
**

**Fig. S3. PBMC cytokine release induction by compounds 17 and 18.** Compounds **17** induces TNF-a (**a**) and IFN-a (**b**) secretion, but compound **18** fails to induce any relevant changes in cytokine production. However, the effects of **17** dissapear if compound administration is performed 30 min after dissolution in water (**c**,**d**), supporting the hydrolysis-dependent inactivation of **17**.

# Synthetic procedures and compounds characterization

All reagents were used as received without any purification procedures. High grade solvents were used in small-scale preparations, while commercial and industrial grade solvents were used in the routine large-scale reactions, except for dimethylacetamide (DMAc). For reactions requiring dry solvents, these were prepared following standard drying methods 1. Air-sensitive reagents, such as lithium bases, were handled using standard air-tight equipment under controlled atmosphere. Chromatography grade acetonitrile was used as eluent in the HPLC system. Solvents used in the LC-HRMS system were of LC/MS grade (OptimaTM grade; ThermoFisher Scientific). Anhydrous deuterated DMSO (DMSO-*d6*, 99.96% D), chloroform (CDCl3, 99.80% D), methanol (CD3OD, 99.95% D) and water (D2O, >99.90% D), all from Eurisotop, were used in all NMR experiments. Anhydrous N2, (99.999%, AlphagazTM 1), anhydrous H2 (99.999% AlphagazTM 2) and industrial grade CO2 were obtained from Air Liquide Portugal. Anhydrous NH3 (≥99.95%) was purchased from Linde Portugal.

## Reaction monitoring

### Thin-layer chromatography

Reactions conducted in volatile organic solvents (ethyl acetate, acetone, etc.) were monitored through thin-layer chromatography (TLC) in aluminium silica gel-coated plates (TLC Silica Gel 60Å F254; Merck KGaA). Plates were eluted with solvent mixtures mentioned in each case and observed using UV light at either 254 nm or 366 nm. Whenever necessary, the revealing agents in Table S1were used to identify the compounds.

Table S1 – TLC revealing agents used.

| Functional group identified | Revealing compound | Expected result |
| --- | --- | --- |
| Primary and secondary alcohols | Alkaline potassium permanganate  (1.5 g KMnO4, 10 g K2CO3, 0.125 g NaOH, 200 mL H2O) | Negative – purple coloration  Positive – yellow/brown coloration |
| Aldehydes | Dinitrophenylhydrazine (DNP)  (12 g DNP, 60 mL H2SO4, 80 mL H2O, 200 mL 96% ethanol) | Negative – no reaction  Positive – yellow/orange coloration |

### High-performance liquid chromatography (HPLC)

Most reactions were monitored by RP-HPLC. HPLC analysis was also used to determine the purity of most compounds. All analyses were performed in a modular HPLC system composed of a Varian ProStar 410 autosampler, two 210-LC chromatography pumps and a ProStar 325 UV detector (Varian, Inc.). Samples (1-50 µl) were injected onto the column via a Rheodyne injector (Rheodyne LLC,) with a 100 µL loop in the µL pickup injection mode. Separations were conducted at room temperature, using a ThermoFisher Scientific BDS Hypersil C18 (Ø4.6 x 250 mm, 5 µm) reversed phase column and a 1 mL/min flow rate. The mobile phase consisted of 0.1% (v/v) formic acid in water (Eluent A) and acetonitrile (Eluent B). The following elution gradient was used: 0-2 min isocratic 5% B, 2-22 min linear gradient to 100% B, 22-28 min isocratic 100% B, 28-30 min linear gradient to 5% B, 30-32 min isocratic 5% B. Chromatograms were recorded at 254 nm and data acquisition and processing were performed using Varian MS Control 6.9.6 software.

##

## Preparative chromatography

Open column chromatography: Routine column chromatography was performed using glass fritted columns with 1.25, 2.5 and 5 cm diameter, with variable heights. Silica gel 60 Å 70-200 mesh (VWR) was used as stationary phase and the columns were eluted by gravity.

Semi-preparative HPLC system: A semi-preparative HPLC system was assembled using a Varian ProStar 210-LC chromatography pump coupled to either a Supervarioflash® D26 cartridge (VWR) or a glass Ø25 x 92 mm column packed with Sephadex® LH-20 (GE Healthcare,). The system was operated at flow rates of 1 to 5 mL/min with various organic and aqueous solvent mixtures.

## Melting point

Melting points (m.p.) were determined in a Buchï B-545 (Buchï AG) using Ø0.5 mm glass capillaries, without correction. The maximum value measurable was 400 ºC with an associated error of 0.8 ºC.

## UV-VIS and fluorescence spectroscopy

UV-VIS spectra were recorded in either a Shimadzu UV-3101 UV-VIS-NIR spectrophotometer (Shimadzu Corp.) using quartz 1 cm cuvettes, or in a SPECTROstar Omega plate reader equipped with an *LVis* low-volume measurements plate (BMG Labtech).

## NMR spectroscopy

### Compound characterization

1H-NMR spectra were recorded on Bruker Avance II+ 300 or 400 spectrometers, equipped with broad-band probes (BBO) or on a Bruker Avance III 500 spectrometer (Bruker), equipped with either a BBO or an inverse probe (TXI), operating at 300, 400 and 500 MHz, respectively. 13C-NMR spectra were recorded on the same instruments, operating at 75.47, 100.62 and 125.76 MHz, respectively. Chemical shifts are reported in ppm downfield from tetramethylsilane and coupling constants (*J*) are reported in Hz, with the subscripts *ortho* and *meta* referring to *ortho* and *meta* couplings, respectively, while *J1H-1H* correspond to vicinal coupling. The presence of labile protons was confirmed by chemical exchange with D2O. Resonance and structural assignments were based on the analysis of coupling patterns, including the 13C-1H coupling profiles obtained in bidimensional heteronuclear single quantum coherence (HSQC) and heteronuclear multiple bond correlation (HMBC) experiments, performed with standard pulse programs. For some compounds, the resolution of 13C and bidimensional spectra were not enough to unequivocally identify and assign signals. 1H-1H correlation spectroscopy (COSY), nuclear Overhauser effect spectroscopy (NOESY) and selective NOESY (selNOESY) experiments were also performed using standard pulse programs from Bruker to complete the structural characterization of compounds. All spectra were recorded using Bruker Topspin v3.6.1.

## Mass spectrometry

### Low-resolution MS

Samples were analysed in an LCQ Fleet ion trap mass spectrometer equipped with an ESI ion source (Thermo ScientificTM). The mass spectrometer was operated in the ESI positive and negative ion modes, with the following optimized parameters: ion spray voltage, ±4.5 kV; capillary voltage, 16/-18 V; tube lens offset, -70/58 V; sheath gas (N2), 40 arbitrary units; auxiliary gas (N2), 20 arbitrary units; capillary temperature, 300 ºC. MS-spectra typically correspond to an average of 20–35 scans, and were recorded in the full acquisition mode in the range between 100-1000 Da. Tandem mass spectra (MSn, n=2-4) were obtained with an isolation window of 2 *m/z* units, 25-35% relative collision energy, and with excitation time of 30 msec. Data acquisition and processing were performed using the Xcalibur 2.2 software.

### High-resolution MS (HRMS)

High-resolution mass spectra were acquired with a quadrupole time-of-flight (QTOF) Impact II mass spectrometer with an electrospray ion source (Bruker Daltonics). Analyses were performed in positive or negative electrospray ionization (ESI+/ESI-) mode operating in the high-resolution mode over the *m/z* range of 50–1000 with an acquisition rate of 3 Hz. The optimized mass spectrometer parameters were as follows: ion spray voltage, 2.5 kV; end plate offset, −500 V; nebulizer gas (N2), 2.8 bars; dry gas (N2), 8 L/min; dry heater, 200°C. Sodium formate (10 mM) was used for internal calibration on the high-precision calibration mode (HPC). Data were recorded using Bruker DataAnalysis 4.6.

### LC-ESI-HRMS

For LC-ESI-HRMS analysis, an UHPLC Ultimate 3000 RSLC nanosystem (ThermoFisher Scientific) coupled with the above described mass spectrometer was used. Chromatographic separations were carried out with a Kinetex C18 column (2.6 μm, 150 × 2.1 mm; Phenomenex). The mobile phase consisted of 0.1% aqueous formic acid (eluent A) and acetonitrile (eluent B), delivered at the flow rate of 150 μL/min. The gradient used was as follows: 0-2 min isocratic 5% B, 2-22 min linear gradient to 100% B, 22-28 min isocratic 100% B, 28-30 min linear gradient to 5% B, 30-32 min isocratic 5% B. Samples (1-5 μL) were analysed in broadband collision-induced dissociation (bbCID) and in product ion scan mode. In bbCID, low collision energy and high collision energy are applied simultaneously to generate fragments and precursor ions in a single run. The product ion scan mode (MS/MS) was used to confirm the fragment ions.

## Solvolysis studies

1H NMR-based solvolysis studies were conducted by diluting a DMSO-*d6* solution of the test compound with an equal volume of D2O. 1H NMR spectra were acquired every 5 minutes for at least 3 hours continuously, followed by additional spectra at 12 and 24 hours. All scans were performed at 37 °C using the internal probe heater, and samples were kept at 37 °C in an oven between scans. Half-lives were computed using a 1-phase decay model

(, percentage abundance, relative to initial value, ; , decay rate constant; , horizontal asymptotic limit) and given as the limits of the 95 % confidence interval.

For MS-based solvolysis studies, triplicate samples of each test compound (5 µM) were prepared in 50 mM ammonium bicarbonate buffer (pH 7.4). A 1 µL sample from each vial was analysed every 32 minutes over a 24-hour period, with samples maintained at 37 °C in the LC carousel.

# Synthesis and characterization

## Synthesis of 4,4'-diamino[1,1'-biphenyl]-3,3'-dicarboxylic acid (11) by oxidation of 3,3’-dimethylbenzidine

**Fig. S4. Synthetic route towards 11 from 3,3’-dimethylbenzidine (11a).**

### N,N'-(3,3'-dimethyl[1,1'-biphenyl]-4,4'-diyl)diacetamide (**11b**)

A 2-L cylindrical glass reactor equipped with a high-efficiency reflux condenser, stainless steel mechanical stirrer with 20º-tilted blades, temperature probe and addition funnel was charged with 100 g (471 mmol) of 3,3’-dimethylbenzidine (**11a**, 98%; Alfa Aesar), 1 L of dichloromethane (tech. grade, Carlo Erba Reagents) and 200 mL (1.4 mol) of triethylamine (>99%; Sigma-Aldrich). The mixture was stirred at room temperature until complete dissolution of the starting material and 200 mL (2.1 mol) of acetic anhydride (>99%; Sigma-Aldrich) were slowly added through the addition funnel. The mixture was stirred for 1h, during which the reaction proceeded with the release of high amounts of heat causing the solvent to boil. After cooling to room temperature, the precipitate was separated by filtration, washed with approx. 500 mL of dichloromethane and dried under vacuum overnight. The product was obtained as a white amorphous powder (135 g, 97% yield)

Note 1: reactors or flasks used in this preparation should be filled to no more than half of their height as these can easily overboil.

Note 2: reducing the rate of addition of the anhydride to the mixture has little effect on the reaction control.

Note 3: in some preparations, the reaction had a lag time of several minutes.

Note 4: the use of triethylamine as a base is advised as the sub-product of the reaction (triethylammonium acetate) is soluble in dichloromethane and traces of it can be removed during the drying process.

Characterization of **11b**

**Appearance:** white amorphous powder

**Melting point:** 319-320 ºC.

**1H NMR:** (DMSO-*d6*, 400 MHz) δ 9.31 (2H, s), 7.41-7.50 6H, m,), 2.26 (6H, s), 2.07 (6H, s)

**13C NMR:** (DMSO-*d6*, 101 MHz) δ 168.25, 135.76, 131.64, 128.20, 126.72, 125.11, 123.88, 23.37, 18.05

**2D NMR:** HSQC, HMBC

**HRMS:** (ESI+) *m/z* calculated for [C18H21N2O2]+: 297.1598, found: 297.1595 (Δ: -1.01 ppm).

### 4,4'-diamino[1,1'-biphenyl]-3,3'-dicarboxylic acid (**11**, bis-anthranilic acid)

A 5-L spherical reactor equipped with a high-efficiency reflux condenser, Teflon®-coated mechanical stirrer with 45º-tilted blades, temperature probe and safety blast valve, was charged with 25 g (84 mmol) of compound **11b**, 150 g (886 mmol) of potassium permanganate (>99%; PanReac Applichem), 700 mL of pyridine (>99%; ThermoFisher Scientific), 700 mL of *t*-butanol (>99%; ThermoFisher Scientific) and 700 mL of distilled water. The mixture was heated in a 60 ºC water bath for 2 hours with vigorous stirring. Methanol (100 mL) was added to quench the unreacted oxidant, the mixture was filtered while hot and the filter cake was washed with methanol. The liquor was transferred into a 2-L round bottom flask and the volatiles were removed by evaporation in a rotary evaporator heated to 70 ºC. The resulting solid was combined with 40 g of sodium hydroxide and 1 L of distilled water and heated overnight in an oil bath to the reflux temperature.

The solution was cooled in an ice bath and the pH was adjusted to 9-10 with concentrated hydrochloric acid. The mixture was diluted with 1 L of distilled water and transferred into a 5-L round bottom reactor equipped with a glass mechanical stirrer with 45º-tilted blades, a Ø10 mm steam inlet port and a G2 fritted bottom drainage valve, containing 1 kg of Amberlite® IRA-402 anionic exchange resin (OH- form; Sigma-Aldrich). The system was stirred at room temperature for 30 minutes and drained. The resin was washed with a total of 10 L of distilled water to remove contaminants and the desired product was desorbed from the resin using 5-6 L of a methanol/37% HCl 9:1 mixture. Steam was injected by the injection port to increase the system temperature to 40-45 ºC. The methanol extracts were concentrated in the rotary evaporator and vacuum dried affording **11** as a dihydrochloride salt, presenting as a yellow solid (23.5 g, 81%).

Note 1: the oxidation process consume large amounts of permanganate as this tends to self-reduce.

Note 2: efficient stirring is extremely important to prevent the uncontrolled evolution of the reaction.

Note 3: the reaction is quite exothermic and reaches over 60 ºC in few minutes upon addition of the solvents.

Note 4: water should be the last component to be added to the reactor.

Note 5: quenching of the reaction with methanol must be done carefully.

Note 6: the alkaline hydrolysis process can be completed in 2-3 hours if efficient heating and stirring is provided.

Note 7: ion-exchange works best if the resin is stirred during the process.

Note 8: desorption of the product from the resin requires large amounts of methanol and HCl that can be recycled.

Note 9: the final product is obtained as a dihydrochloride salt, as determined by silver nitrate titration and quantitative 1H NMR experiments using 1,3,5-tribromobenzene as internal standard. In the silver nitrate titration, a sample of the compound was diluted in distilled water with a few drops of nitric acid. A 100 mM solution of silver nitrate was added to the mixture forming a precipitate of insoluble silver chloride. This precipitate was easily dissolved in 25% ammonia, proving that the compound was in the form of a hydrochloride.

Specifically, 4.272 mg of compound **11** were dissolved in water acidified with nitric acid. To the clear solution, an excess of 100 mM AgNO3 was added and the precipitate was separated by centrifugation and washed with a small amount of water. After drying, the mass of AgCl was determined (4.256 mg, corresponding to 0.296 mmol of Cl-). Considering that each product molecule contains two HCl molecules, 4.272 mg of compound corresponds to 0.248 mmol of Cl-, which is approximately the same number of mols of AgCl recovered.

The stoichiometry of the counter-ions in the product was further confirmed using 1H NMR. 1,3,5-Tribromobenzene (6.06 mg, 57,75 μmol of H) was dissolved in DMSO-*d6* along with 5 mg of product **71**. The area of the 1H signal of the aromatic proton adjacent to the carboxylic acid was normalized to 1, which yielded the area of the protons of the standard as 1.928. Direct proportionality leads to 29.95 μmol of aromatic protons in the test sample of compound **11**, corresponding to a total of 14.975 μmol of product. Dividing the mass of product (5 mg) by this value gives a putative molecular weight of 333.89 g/mol. The molecular weight of compound **11**•2HCl is 345.178 g/mol. This indicates that the compound is in the form of a dihydrochloride with 96.8% purity.

Characterization of **11**

**Appearance:** yellow solid

**Melting point:** > 280 ºC (dec.)

**1H NMR:** (DMSO-*d6*, 400 MHz) δ 7.87 (2H, d, *J* = 1.4 Hz), 7.50 (2H, dd, *J* = 2.0, 8.6 Hz), 6.88 (2H, d, *J* = 8.6 Hz)

**13C NMR:** (DMSO-*d6*, 101 MHz) δ 169.19, 146.07, 131.74, 129.41, 119.77, 115.53, 114.12

**2D NMR:** HSQC, HMBC

**HRMS:** (ESI+) *m/z* calculated for [C14H12N2O4+H]+: 273.0876 , found: 273.0863 (Δ: -4.76 ppm).

**MSn:** (ESI+) *m/z* 273 [M+H]+. The MSn fragmentation pattern is given in Fig. S5.

**Fig. S5. Proposed ESI(+) MSn fragmentation pattern of compound 11.**

## Synthesis of 4-amino-4'-(pentanoylamino)[1,1'-biphenyl]-3,3'-dicarboxylic acid (12)

*Bis*-anthranilic acid dihydrochloride (**11**•2HCl, 3 g, 8.7 mmol) was dissolved in 60 mL of dimethylacetamide (DMAc, 99%; Sigma-Aldrich) in a three-neck 250 mL round-bottom flask. The clear orange solution was placed under nitrogen and cooled to 0 ºC in an ice bath. Pentanoyl chloride (1.03 mL, 8.7 mmol, 98%; Alfa Aesar) was added dropwise with stirring. The mixture was stirred for 30 minutes, the cooling bath was removed, and the solution allowed to reach room temperature and stirred for further 30 minutes. The mixture was transferred into a 1-L separation funnel filled with 500 mL of 10% HCl and thoroughly shaken. The mixture was extracted twice with 300 mL of ethyl acetate (99%; Carlo Erba Reagents). The organic extracts were combined and back extracted with 500 mL of water to completely remove DMAc and excess HCl, dried over anhydrous magnesium sulphate (tech grade; PanReac Applichem), and concentrated in the rotary evaporator affording 2-3 g of a mixture with 60-70% of de desired product. Compound **12** was isolated from this mixture by semi-preparative chromatography. The mixture was dissolved in 5-7 mL of DMSO and injected into a Sephadex® LH-20 (GE Healthcare) column (Ø33 x 220 mm, B.V ≈ 190 mL) equilibrated with a chloroform/*n*-hexane/methanol (9.5/9.5/1) mixture. The system was eluted with 8 B.V. of the same solvent mixture after which the product was desorbed with 100% methanol (2-3 B.V.). The methanolic fractions were concentred in the rotary evaporator affording compound **12** as a yellow solid (0.5-0.9 g, 16-29% yield). Purity (HPLC): >99%.

Note 1: Addition of diluted acid chloride (instead of neat) has little to no effect on the conversion and selectivity of amide formation.

Note 2: The mixture obtained after the first extraction contains 25% of di-substituted product.

Characterization of **12**

**Appearance:** yellow solid

**1H NMR:** (DMSO-*d6*, 400 MHz) δ 11.04 (1H, s), 8.52 (1H, d, *J* = 8.7), 8.09 (1H, d, *J* = 1.9), 7.96 (1H, d, *J* = 2.04), 7.78 (1H, dd, *J* = 2.12, 8.96 ), 7.56 (1H, dd, *J* = 2.20, 8.68), 6.85 (1H, d, *J* = 8.56), 2.39 (2H, t, *J*= 7.48), 1.62 (2H, qi, *J* = 7.44), 1.35 (2H, sx, *J* = 7.36), 0.91 (3H, t, J = 7.36)

**13C NMR:** (DMSO-*d6*, 101 MHz) δ 171.19, 169.5, 169.3, 149.79, 139.16, 133.78, 131.74, 130.89, 128.46, 127.38, 125.89, 120.63, 117.77, 116.89, 110.79, 37.27, 27.04, 21.70, 13.71

**2D NMR:** HSQC, HMBC

**HRMS:** (ESI+) *m/z* calculated for [C19H20N2O5+H]+: 357.1451, found: 357.1460 (Δ: 2.52 ppm).

**MS:** (ESI-) 355 [M-H]-.

## Synthesis of family 13 compounds

### General procedure for the synthesis of 2’-butyl-2-R-4H,4’H-[6,6’-bi-3,1-benzoxazine]-4,4’-dione compounds

In a 100-mL, 3-neck round bottom flask equipped with gas inlet and outlet and a magnetic stirring bar, 1 g (2.8 mmol) of compound **12** was dissolved in *ca*. 50 mL of DMAc. The mixture was placed under nitrogen atmosphere and 1.2 equivalents of the appropriate acid chloride were added. The mixture was allowed to react at room temperature for 30-90 minutes. The reaction mixture was then transferred into an Erlenmeyer flask containing 500 mL of distilled water and stirred for 5-20 minutes. The mixture was acidified with 2-3 mL of 37% HCl and the precipitate was separated by filtration, dried and washed with 20-50 mL of diethyl ether. The solid was then transferred into a 100 mL round-bottom flask and 25-50 mL of acetic anhydride were added. The mixture was heated in an oil bath to the reflux temperature for 2-16 h, and then allowed to cool to room temperature. The mixture was then poured over 200-300 g of crushed ice and stirred. Sodium bicarbonate or carbonate was added to neutralise the mixture, and the desired products were isolated by filtration or by liquid-liquid extraction with ethyl acetate. Yields: 19 – 43%.

### General procedure for the synthesis of carboxylic acid chlorides

When not commercially available, acid chlorides were prepared from the corresponding carboxylic acids (prepared as described below) by reaction with oxalyl chloride (98%; Alfa Aesar) in acetonitrile (50-100 mL) with a catalytic amount of DMAc (0.5-1 mL). As the acid chlorides here generated were immediately used in the synthesis of the correspondent derivatives (previous paragraph), a typical reaction employed 3.6 mmol of carboxylic acid (1.2 molar equivalents relative to the 2.8 mmol of compound **12** used in the preparations. A typical procedure consisted of transferring 3.6 mmol of carboxylic acid into a round bottom flask previously purged with nitrogen. To this, acetonitrile and DMAc were added, followed by 1.2 eq. of oxalyl chloride (4.32 mmol, 370 μL). The mixture was then stirred at room temperature for 15-30 minutes and then concentrated under vacuum affording the acid chlorides as oils mixed with DMAc. These mixtures were then used directly.

### 2’-butyl-2-phenyl-4H,4’H-[6,6’-bi-3,1-benzoxazine]-4,4’-dione (**13a**)

Obtained by reaction of compound **12** with benzoyl chloride (99%; Sigma-Aldrich), in 43% yield (511 mg, 1.20 mmol). Purity (HPLC): 96.3%.

Characterization of **13a**

**Appearance:** white solid

**1H NMR:** (DMSO-*d6*, 300 MHz) δ 8.45 (1H, d, *J* = 1.98 Hz), 8.38 (3H, m), 8.24 (1H, s), 8.23 (1H, s), 7.84 (1H, d, *J* = 8.35 Hz), 7.71-7.61 (4H, m), 2.67 (2H, t, *J =* 7.43 Hz), 1.72 (2H, qi, *J =* 7.43 Hz), 1.41 (2H, sx, *J =* 7.78, 0.93 Hz), 0.93 (3H, t, *J =* 7.43 Hz)

**13C NMR:** (DMSO-*d6*, 75 MHz) δ 163.71, 159.6, 159.3, 157.2, 146.5, 146.2, 138.4, 138.2, 135.6, 135.5, 133.4, 130.4, 129.6 (2C), 128.4 (2C), 128.3, 127.7, 126.2, 126.0, 118.1, 117.8, 34.07, 27.87, 22.02, 14.14

**2D NMR:** HSQC, HMBC

**HRMS:** (ESI+) *m/z* calc. for [C26H20N2O4+H]+: 425.1496, found 425.1485 (Δ: -2.6 ppm)

**MSn:** (ESI+) *m/z* 425 [M+H]+, 407 [MH-H2O]+, 395 [MH-C2H6]+, 341 [MH-C5H8O]+, 313 [MH-C6H8O2]+, 278 [MH-C8H5NO2]+

### 2’-butyl-2-(3’’-chlorophenyl)-4H,4’H-[6,6’-bi-3,1-benzoxazine]-4,4’-dione (**13b**)

Obtained by reaction of compound **12** with 3-chlorobenzoyl chloride (>99%, Alfa-Aeasar), in 28% yield (360 mg, 0.78 mmol). Purity (HPLC): 95.6%.

Characterization of **13b**

**Appearance:** pale yellow solid

**1H NMR:** (DMSO-*d6*, 500 MHz) δ 8.35 (4H, m), 8.13 (1H, s), 8.12 (1H, s), 7.81 (1H, d, *J* = 7.92 Hz), 7.73 (1H, d, *J* = 6.93 Hz), 7.65 (2H, m), 2.67 (2H, t, *J =* 7.59 Hz), 1.71 (2H, qi, *J =* 7.59 Hz), 1.40 (2H, sx, *J =* 7.26 Hz), 0.93 (3H, t, *J =* 7.92 Hz)

**13C NMR:** (DMSO-*d6*, 126 MHz) δ 163.2, 159.1, 158.4, 155.4, 145.8, 145.6, 138.2, 137.5, 135.1, 135.0, 134.6, 133.8, 132.5, 132.1, 131.1, 128.9, 127.9, 127.2, 126.4, 125.7, 125.5, 117.7, 117.3, 33.6, 27.4, 21.6, 13.7

**2D NMR:** HSQC, HMBC

**HRMS:** (ESI+) *m/z* calc. for [C26H1935ClN2O4+H]+: 459.1106, found 459.1104 (Δ: -0.4 ppm)

### 2’-butyl-2-(3’’,5’’-dinitrophenyl)-4H,4’H-[6,6’-bi-3,1-benzoxazine]-4,4’-dione (**13c**)

Obtained by reaction of compound **12** with 3,5-dinitrobenzoyl chloride (98%; Merck KGaA), in 22% yield (562 mg, 1.09 mmol). Purity (HPLC): 98.0%.

Characterization of **13c**

**Appearance:** yellow solid; poorly soluble in DMSO

**1H NMR:** (DMSO-*d6*, 500 MHz) δ 9.8 (2H, s), 9.06 (1H, s), 8.54-8.04 (4H, m), 8.00 (1H, d, *J* = 8.17 Hz), 7.73 (1H, d, *J*= 8.41 Hz), 2.73 (2H, t, *J =* 7.55 Hz), 1.79 (2H, qi, *J =* 7.55 Hz), 1.47 (2H, sx, *J =* 7.34), 0.97 (3H, t, *J =* 7.34 Hz)

**13C NMR:** (DMSO-*d6*, 126 MHz) δ 158.1, 148.7, 145.2, 137.5, 135.2, 133.2, 128.3, 127.2, 125.9, 125.8, 121.7, 33.6, 27.4, 21.6

**HRMS:** (ESI+) *m/z* calc. for [C26H18N4O8+H]+: 515.1197, found 515.1186 (Δ: -2.1 ppm)

### 2-(benzofuran-2’’-yl)-2’-butyl-4H,4’H-[6,6’-bi-3,1-benzoxazine]-4,4’-dione (**13d**)

Synthesis of benzofuran-2-carboxylic acid (**S65**)

**Fig. S6. Synthesis sequence of compound S65.**

The synthesis of benzofuran-2-carboxylic acid (**S65**) was adapted from the process described by Kowalewska *et al.*2 A 250-mL three-neck round-bottom flask equipped with a reflux condenser, thermometer and a magnetic stirring bar was charged with 10.5 g of potassium carbonate (76 mmol), 5.3 mL of salicylaldehyde (51 mmol, 99%; Merck KGaA), 5.9 mL of ethyl chloroacetate (55 mmol, 99%; Merck KGaA) and 70 mL of DMF. The mixture was heated in a sand bath to 95-100 ºC for 3 hours. The mixture was then removed from the heating bath and directly poured over 200 g of crushed ice. The white precipitate was separated by filtration, washed with 100 mL of distilled water, and transferred to a 100-mL three-neck round bottom flask equipped with a reflux condenser, thermometer, and a magnetic stirring bar. Twenty mL of a 1M sodium hydroxide solution were added and the mixture was heated to reflux for 2 hours, poured in 100 mL of ice, and acidified to pH < 2 with concentrated HCl. The desired product was isolated as a white precipitate and dried under vacuum (3.46 g, 21.3 mmol, 43%). Purity (HPLC): 98%

Characterization of **S65**

Data consistent with literature2. Data provided for convenience.

**Appearance:** white solid

Melting point: 193-194 ºC (193-196 ºC lit.; Sigma-Aldrich)

**1H NMR:** (DMSO-*d6*, 400 MHz) δ 7.78 (1H, d, *J* = 7.71 Hz), 7.69 (1H, d, *J* = 8.28 Hz), 7.66 (1H, s), 7.48 (1H, t, *J*= 7.81 Hz), 7.33 (1H, t, *J* = 7.37 Hz)

**13C NMR:** (DMSO-*d6*, 101 MHz) δ 160.16, 155.04, 146.23, 127.61, 126.91, 123.87, 123.15, 113.56, 112.11

**MS:** (ESI-) *m/z* 161 [M-H]-.

### Synthesis of **13d**

Obtained by reaction of compound **12** with benzofuran-2-carboxylic acid chloride (from **S65** following the general method), in 4% yield (52 mg, 0.11 mmol). Purity (HPLC): 95.7%.

Characterization of **13d**

**Appearance:** white solid

**1H NMR:** (DMSO-*d6*, 500 MHz) δ 8.39-8.32 (4H, m), 7.89 (1H, s), 7.82 (2H, d, *J*= 7.92 Hz), 7.77 (1H, d, *J*= 7.92 Hz), 7.67 (1H, d, *J*= 8.45 Hz), 7.53 (1H, t, *J*= 7.92 Hz), 7.38 (1H, t, *J*= 7.39 Hz), 2.67 (2H, t, *J =* 7.92 Hz), 1.71 (2H, qi, *J =* 7.39 Hz), 1.40 (2H, sx, *J =* 7.39 Hz), 0.93 (3H, t, *J =* 7.39 Hz)

**13C NMR:** 163.7, 159.6, 158.4, 155.9, 150.1, 146.2, 146.1, 145.9, 138.6, 137.9, 135.5, 128.3, 127.7, 127.6, 126..2, 126.0, 124.6, 123.5, 118.4, 117.7, 113.5, 112.4, 34.0, 27.8, 22.0, 14.3.

**2D NMR:** HSQC, HMBC

**HRMS:** (ESI+) *m/z* calc. for [C28H20N2O5+H]+: 465.1450, found 465.1445 (Δ: -1.1 ppm)

### 2’-butyl-2-(1’’-methyl-1H-indol-3’’-yl)-4H,4’H-[6,6’-bi-3,1-benzoxazine]-4,4’-dione (**13e**)

Synthesis of 1-methyl-1H-indole-2-carboxylic acid (**S66**)

**Fig. S7. Synthesis approach to compound S66.**

1-methyl-1H-indole (**S66b**)

A 500-mL round bottom flask was charged with 5 g (42.7 mmol) of indole (**S66a**, 99%; Merck KGaA) and 100 mL of DMF dried over 4 Å molecular sieves. Approximately 2.04 g of sodium hydride (60% dispersion in mineral oil, 51 mmol, 1.2 eq.; Sigma-Aldrich) were added and the mixture was stirred in an ice bath for one hour. Methyl iodide (51 mmol, 1.2 eq., 3.2 mL; 99%; Merck KGaA) was added to the reaction mixture, the ice bath was removed, and the mixture was stirred for 2 hours. The mixture was diluted with 500 mL of distilled water and extracted with *n*-hexane (2 x 300 mL), the extracts were combined, dried over anhydrous magnesium sulphate and concentrated in the rotary evaporator affording the desired product as a yellow oil (5 g, 38 mmol, 89%). Purity (HPLC): 95 %. 1H NMR identical to authentic standard.

1-methyl-1H-indole-2-carboxylic acid (**S66**)

The product obtained in the previous step was transferred into a 100-mL 3-neck round-bottom flask equipped with a thermometer, a gas inlet and a rubber seal, placed under nitrogen atmosphere and dissolved in 150 mL of dry THF. The solution was cooled in an acetone/liquid nitrogen slush and a solution of *n*-butyllithium (23 mL, 2M in hexanes, 46 mmol, 1.2 eq.; Sigma-Aldrich) was slowly added causing the formation of a white precipitate. After complete addition of the base, CO2 was admitted into the system and the cooling bath was removed. The mixture changed quickly to a red colour that faded into a pale yellow with the admission of more CO2 gas. After 15 minutes, 50 mL of distilled water were added to consume the excess base. The reaction mixture was further diluted with 500 mL of 10% HCl causing the formation of a white precipitate that was separated by filtration, washed with 10% HCl and dried under vacuum (3.85 g, 22 mmol, 58%). Purity (HPLC): >99 %.

Characterization of **S66**

**Appearance:** white solid

**1H NMR:** (DMSO-*d6*, 500 MHz) δ 12.87 (1H, s), 7.67 (1H, d, *J* = 8.11 Hz), 7.56 (1H, d, *J* = 8.65 Hz), 7.33 (1H, t, *J* = 7.84 Hz), 7.23 (1H, s, H3), 7.12 (1H, t, *J* = 7.57 Hz), 4.03 (3H, s)

**13C NMR:** (DMSO-*d6*, 126 MHz) δ 163.4, 139.7, 129.1, 128.50, 125.56, 124.57, 122.16, 120.31, 110.80, 109.40, 31.45.

**2D NMR:** HSQC, HMBC

**HRMS:** (ESI+) *m/z* calc. for [C10H9NO2-H]-: 174.0561, found 174.0558 (Δ: -1.7 ppm)

### Synthesis of **13e**

Obtained by reaction of compound **12** with 1-methyl-1*H*-indole-2-carboxylic acid chloride (obtained from **S66** following the general method), in 3% yield (40 mg, 0.08 mmol). Purity (HPLC): 97.2%.

Characterization of **13e**

**Appearance:** brown solid; poorly soluble in DMSO

**1H NMR:** δ 8.47-7.11 (11H, m), 4.28 (3H, s), 2.71 (2H, t, *J =* 7.53 Hz), 1.71 (2H, qi, *J =* 7.53 Hz), 1.40 (2H, sx, *J =* 7.53 Hz), 0.93 (3H, t, *J =* 7.35 Hz)

**HRMS:** (ESI+) *m/z* calc. for [C29H23N3O4+H]+: 478.1761, found 478.1746 (Δ: -3.1 ppm)

### 2-(naphth-1-yl)-2’-butyl-4H,4’H-[6,6’-bi-3,1-benzoxazine]-4,4’-dione (**13f**)

Obtained by reaction of compound **12** with 1-naphthoic acid chloride (98%; Sigma-Aldrich), in 20% yield (265 mg, 0.56 mmol). Purity (HPLC): 99.0%.

Characterization of **13f**

**Appearance:** brown solid; poorly soluble in DMSO

**1H NMR:** (DMSO-*d6*, 500 MHz) δ 9.08 (1H, d, *J*= 8.90 Hz), 8.52-7.67 (12H, m), 2.70 (2H, t, *J =* 7.58 Hz), 1.74 (2H, qi, *J =* 7.58 Hz), 1.42 (2H, sx, *J =* 7.58 Hz), 0.94 (3H, t, *J =* 7.55 Hz)

**HRMS:** (ESI+) *m/z* calc. for [C30H22N2O4+H]+: 475.1652, found 475.1641 (Δ: -2.3 ppm).

### 2’-butyl-2-(phenoxymethyl)-4H,4’H-[6,6’-bi-3,1-benzoxazine]-4,4’-dione (**13g**)

Obtained by reaction of compound **12** with phenoxyacetyl chloride (>99%; Sigma-Aldrich), in 38% yield (483 mg, 1.06 mmol). Purity (HPLC): 97.1%.

Characterization of **13f**

**Appearance:** white solid

**1H NMR:** (DMSO-*d6*, 500 MHz) δ 8.43 (1H, d, *J* = 2.01 Hz), 8.41 (1H, d, *J* = 2.01 Hz), 8.35 (2H, m), 7.75 (1H, d, *J* = 8.49 Hz), 7.71 (1H, d, *J* = 8.49 Hz), 7.33 (2H, m), 7.11 (1H, s), 7.09 (1H, s), 7.00 (1H, t, *J* = 7.10 Hz), 5.14 (2H, s), 2.70 (2H, t, *J =* 7.57 Hz), 1.74 (2H, qi, *J =* 7.57 Hz), 1.41 (2H, sx, *J =* 7.57 Hz), 0.94 (3H, t, *J =* 7.57 Hz).

**13C NMR:** 163.2, 159.1, 158.5, 158.3, 157.7, 145.8, 145.0, 138.5, 137.6, 135.3, 135.1, 129.6 (2C), 127.6, 127.2, 125.8, 125.7, 121.5, 117.8, 117.3, 114.8 (2C), 65.8, 33.6, 27.4, 21.5, 13.6

**2D NMR:** HSQC, HMBC

**HRMS:** (ESI+) *m/z* calc. for [C27H22N2O5+H]+: 455.1601, found 455.1609 (Δ: 1.8 ppm).

## Synthesis of 4-amino-4’-(2-chloracetamido)[1,1’-biphenyl]-3,3’-dicarboxylic acid (15)

A 250-mL 3-neck round-bottom flask equipped with a rubber septum, a gas inlet and outlet and a magnetic stirring bar was charged with 3 g (8.7 mmol) of compound **11** and 150 mL of DMAc. The solution was placed under nitrogen atmosphere and cooled to -10 ºC in a calcium chloride/ice bath. Chloroacetyl chloride (0.69 mL, 8.7 mmol, 98%; Alfa Aesar) was slowly added and the mixture was stirred at -10 ºC for 30 minutes. Upon dilution with 1 L of water, the mixture was acidified with concentrated HCl and extracted with 1.5 L of diethyl ether. The organic extract was washed with 10% HCl, dried over magnesium sulphate, and poured on top of a dry-packed SiO2 column (Ø50 x 250 mm). The system was allowed to elute by gravity and the first coloured fractions were collected. After complete passage of the ether solution, the product was desorbed from the column with THF (1.5 L). The eluted fractions were combined and concentrated in the rotary evaporator affording compound **15** as a yellow/orange powder (1.5 g, 4.3 mmol, 49.5%). Purity (HPLC): >99%.

An alternative to the chromatographic process was developed, allowing the recovery of *ca.* 36% of product **15**, with high purity (*ca.* 90%, HPLC). Briefly, the crude mixture obtained by evaporating the ether extract was mixed with 300 mL of *n*-propanol and stirred at room temperature overnight. The resulting solution was filtered, and the filter cake washed with a small portion of *n*-propanol. The alcoholic solution was then diluted with 300 mL of water and the precipitate was separated by filtration and vacuum dried. This procedure was scaled up to 10 g of starting mixture.

Note 1: reaction temperature above -10 ºC increases the formation of the disubstituted product.

Note 2: concentrations of **11** in the initial solution above 0.02 g/mL result in the formation of more disubstituted product.

Note 3: product obtained by recrystallization on *n*-propanol has sufficient purity for most applications.

Characterization of **15**

**Appearance:** yellow-orange solid

**1H NMR:** (DMSO-*d6*, 300 MHz) δ 13.0 (1H, broad), 8.54 (1H, d, *J* = 8.34 Hz), 8.19 (1H, d, *J* = 1.27 Hz), 8.00 (1H, d, *J* = 1.8 Hz), 7.73 (1H, dd, *J* = 1.27, 8.62 Hz), 7.61 (1H, dd, *J* = 1.49, 8.61 Hz), 6.87 (1H, d, *J* = 8.71 Hz), 4.40 (2H, s)

**13C NMR:** (DMSO-*d6*, 75 MHz) δ 169.4,164.8, 150.9, 138.1, 134.3, 131.7, 128.4, 127.5, 125.3, 119.9, 117.2, 109.9, 43.6

**2D NMR:** HSQC, HMBC

**HRMS:** (ESI+) *m/z* calc. for [C16H13ClN2O5+H]+: 349.0592, found 349.0595 (Δ: 0.86 ppm).

**MS:** (ESI-) *m/z* 347 [M-H]-; isotopic distribution 347/349 3:1.

## Synthesis of 1-((2'-(3,5-dinitrophenyl)-4,4'-dioxo-4H,4'H-[6,6'-bibenzo[d][1,3]oxazin]-2-yl)methyl)-1,4-diazabicyclo[2.2.2]octan-1-ium chloride (17)

**Fig. S8. Synthesis sequence of compound 17.**

### 1-(2-((4'-amino-3,3'-dicarboxy-[1,1'-biphenyl]-4-yl)amino)-2-oxoethyl)-1,4-diazabicyclo[2.2.2]octan-1-ium chloride (**16**)

In a 100-mL round-bottom flask, 1 g (2.9 mmol) of compound **15** and 1.3 g (11.6 mmol, 4 eq.) of DABCO (1,4-diazabicyclo[2.2.2]octane, >99%; Sigma-Aldrich) were dissolved in *ca*. 50 mL of DMSO. The mixture what then heated to approximately 60 ºC overnight. After cooling to room temperature, the mixture was poured into an Erlenmeyer flask containing 200 mL of ice-cold acetone, causing the product to precipitate. This was separated by filtration, washed with cold acetone and dried under vacuum (1.58 g, 2.76 mmol, 95%). NMR analysis (Fig. S9) indicated that the product contained one free DABCO molecule (molecular weight: 573.08 g/mol). Purity (1H NMR): >90%.

Note 1: the free DABCO molecule present in the final product forms a salt with the carboxylic acid on the side of the amide-bearing ring, as evidenced by the selective NOE correlations observed. This also results in the formation of a strong intra-molecular H-bond.

**Fig. S9.** NMR spectra of compound **16**. **a**, 1H spectrum acquired at 500 MHz in DMSO-d6. **b**, Selective NOESY (red line) experiment acquired at 500 MHz of compound **111** in DMSO-d6 overlaid with the 1H spectrum (black line). The signal at 15.98 ppm was selectively irradiated. The NOE correlations are shown as positive signals while the non-correlating protons are shown as negative signals. **c**, expansion of spectrum b showing the positive NOE correlations of the amide proton with the adjacent CH2 protons (A) and the linked DABCO protons (B and C) and a weak correlation with the free DABCO molecule (D); **d**, proposed structure for compound **111** complexed with DABCO, displaying the selective NOE correlations observed in the spectra.

Characterization of **16**

**Appearance:** orange solid

**1H NMR:** (DMSO-*d6*, 500 MHz) δ 15.98 (1H, s), 8.41 (1H, d, *J* = 8.48 Hz), 8.22 (1H, d, *J* = 2.20 Hz), 8.02 (1H, d, *J* = 2.20 Hz), 7.50 (2H, m), 6.76 (1H, d, *J* = 9.32), 4.29 (2H, s), 3.62 (6H, t, *J =* 7.95 Hz), 3.08 (6H, t, *J =* 7.23), 2.76 (12H, s, DABCO).

**13C NMR:** 170.6, 168.8, 160.6, 150.3, 138.1, 133.9, 130.4, 128.6, 127.6, 126.4, 125.9, 125.8, 118.9, 116.7, 112.9, 63.6, 52.4, 45.8 (DABCO), 44.6

**2D NMR:** HSQC, HMBC, COSY, NOESY

**HRMS:** (ESI+) *m/z* calc. for [C22H25N4O5]+: 425.1825, found 425.1822 (Δ: -0.71 ppm).

**MSn:** (ESI+) *m/z* 425 [M]+, 407 [M-H2O]+, 381 [M-CO2]+, 295 [M-H2O-DABCO]+

## 1-((2'-(3,5-dinitrophenyl)-4,4'-dioxo-4*H*,4'*H*-[6,6'-bibenzo[*d*][1,3]oxazin]-2-yl)methyl)-1,4-diazabicyclo[2.2.2]octan-1-ium chloride (17)

One gram of **16** (1.7 mmol) was dissolved in 20 mL of DMAc in a 50 mL round-bottom flask. To the clear yellow solution, 1 mL of DIPEA was added followed by 1.18 g of 3,5-dinitrobenzoyl chloride (5.1 mmol, 3 eq.). The mixture was heated to 60 ºC in a water bath for approximately 1 hour. Upon cooling to room temperature, the mixture was poured in a flask containing 100 mL of ethyl acetate. The precipitate was separated by filtration, washed with a few portions of ethyl acetate and dried under vacuum. Compound **17** was obtained as a yellow powder (0.68 g, 1.1 mmol, 64.7%). Purity (1H NMR): >90%.

Note 1: the compound is difficult to dissolve in DMSO and in the presence of moisture decomposes rapidly, starting with the hydrolysis of the benzoxazinone ring in the DABCO side.

Characterization of **17**

**Appearance:** yellow solid, poorly soluble in DMSO, unstable in solution

**1H NMR:** (DMSO-*d6*, 500 MHz) δ 9.15 (2H, d, *J* = 1.98 Hz), 9.05 (1H, d, *J* = 1.98 Hz), 8.59 (2H, d, *J* = 1.38 Hz), 8.52 (2H, dd, *J* = 1.78, 8.41 Hz), 8.03 (1H, d, *J* = 8.41 Hz), 7.86 (1H, d, *J* = 8.31 Hz), 4.61 (2H, s), 3.65 (6H, t, *J =* 7.32 Hz), 3.08 (6H, t, *J =* 7.32 Hz)

**13C NMR:** (DMSO-*d6*, 126 MHz) δ 158.2, 158.0, 153.6, 151.9, 148.7, 145.4, 144.7, 139.2, 138.7, 135.6 (2C), 135.3, 133.1, 128.4, 128.1, 127.9, 127.2, 126.2, 125.8 (C2), 121.7, 118.55, 118.1, 63.8, 52.2, 44.8, 43.9

**2D NMR:** HSQC, HMBC

**HRMS:** (ESI+) *m/z* calc. for [C29H23N6O8]+: 583.1572, found 583.1565 (Δ: - 1.2 ppm)

**MSn:** (ESI+) *m/z* 425 [M]+, 407 [M-H2O]+, 381 [M-CO2]+, 295 [M-H2O-DABCO]+

**UV-VIS**: λmax 327 nm (PBS pH 7.4).

## Synthesis of 1-(2-((3,3'-dicarboxy-4-(3,5-dinitrobenzamido)-[1,1'-biphenyl]-4’-yl)amino)-2-oxoethyl)-1,4-diazabicyclo[2.2.2]octan-1-ium chloride (18)

A 2-L cylindrical glass reactor equipped with a stainless-steel stirrer, gas inlet and outlet and thermometer, was purged with nitrogen and charged with 1.5 g (4.3 mmol) of compound **11** and 90 mL of DMAc. Upon complete dissolution, the mixture was cooled to -10 ºC in a calcium chloride/ice bath and 1 equivalent of chloroacetyl chloride (342 μL) was added. After approximately 1 hour, the cooling bath was removed, 1.2 g (5.16 mmol, 1.2 eq.) of 3,5-dinitrobenzoyl chloride were added, and the mixture was stirred at room temperature for about 1 hour. Water (500 μL) was added to the mixture to consume the remaining acid chloride, followed by 1 L of diethyl ether. The mixture was stirred at high speed for about 15 minutes and cooled in ice. The precipitate was separated by filtration, washed with small portions of ether and vacuum dried. The solid was then diluted in ca. 150 mL of DMSO and 1.5 g of DABCO were added. The mixture was heated to 50 ºC for 3 hours, cooled to room temperature and diluted with 600 mL of cold acetone, causing a precipitate to appear. This was separated by filtration and washed with more acetone. The yellow cake was transferred to an Erlenmeyer flask and 400 mL of 96% ethanol were added. The mixture was carefully acidified with concentrated HCl to pH 2-3 and boiled for a few minutes. Upon cooling, the mixture was filtered, and the filter cake was sequentially washed with 100% ethanol and diethyl ether and finally dried under high vacuum. Compound **18** was obtained as a fine yellow powder (1.86 g, 2.8 mmol, 65%). Purity (1H NMR): >90%.

Characterization of **18**

**Appearance:** yellow solid

**1H NMR:** (DMSO-*d6*, 500 MHz) δ 13.27 (1H, s), 11.93 (1H, s), 9.08 (2H, s), 9.02 (1H, s), 8.63 (1H, d, *J* = 10.85 Hz), 8.28 (3H, m), 7.99 (2H, m), 4.44 (2H, s), 3.64 (6H, t, *J =* 8.5 Hz), 3.14 (6H, t, *J =* 8.9 Hz)

**13C NMR:** (DMSO-*d6*, 126 MHz) δ 170.1, 169.1, 162.3, 160.9, 148.9 (2C), 139.7, 139.2, 137.7, 134.8, 134.2, 131.6, 131.3, 129.1, 128.8, 127.7 (2C), 122.7, 121.8, 121.7, 121.6, 120.8, 63.7, 53.1, 45.0

**2D NMR:** HSQC, HMBC

**HRMS:** (ESI+) *m/z* calc. for [C29H27N6O10]+: 619.1783, found 619.1788 (Δ: 0.8 ppm)

**MS:** (ESI+) *m/z* 619 [M]+; (ESI-) *m/z* 617 [M-2H+]-

**UV-VIS**: λmax 310 nm (PBS pH 7.4).

## Synthesis of 4-amino-3-carbamoyl-4’-(2-chloroacetamido)[1,1'-biphenyl]-3’-carboxylic acid (19)

**Fig. S9. Synthesis sequence towards compound 19.**

A 500-mL 3-neck round-bottom flask equipped with a gas inlet and a reflux condenser connected to a bubbler filled with 1 M NaOH, was charged with 1.5 g (4.35 mmol) of compound **15** and 250 mL of acetone. The mixture was cooled in an ice bath and 4 mL of a 20% phosgene solution (20% (w/w) in toluene; Sigma-Aldrich), corresponding to 7 mmol of phosgene, were added. The mixture was stirred for 1 hour at 0 ºC and then 1 hour at room temperature. Excess phosgene was eliminated by admitting nitrogen gas through the gas inlet port for *ca*. 15 minutes. The reaction mixture was concentrated in the rotary evaporator and completely dried under high vacuum affording intermediate **S67** as a white powder(not isolated). This was dissolved in 250 mL of THF and returned to the apparatus described before. The solution was cooled in an ice/salt bath and NH3 gas was admitted through the gas inlet. Excess ammonia gas was vented through a gas bubbler filled with water. After 15 minutes, the gas admission was stopped, and the system was allowed to reach room temperature. Stirring was kept at room temperature for one hour before venting the excess ammonia gas by admitting nitrogen gas through the gas inlet. The reaction mixture was then heated to reflux temperature and filtered while hot through a small silica gel plug. The filtrate was then concentrated in the rotary evaporator affording the desired product as a white/yellow solid (0.73 g, 2.1 mmol, 48%). Purity (HPLC): 95.7%.

Characterization of **19**

**Appearance:** pale yellow solid

**1H NMR:** (DMSO-*d6*, 500 MHz) δ 13.15 (1H, bs), 8.50 (1H, d, *J* = 8.68 Hz), 8.22 (1H, d, *J* = 2.04 Hz), 7.99 (2H, bs), 7.83 (1H, d, *J* = 2.02 Hz), 7.75 (1H, dd, *J* = 2.04, 8.69 Hz), 7.46 (1H, dd, *J* = 1.87, 8.48 Hz), 7.10 (2H, bs), 6.76 (1H, d, *J* = 8.55 Hz), 4.36 (2H, s).

**13C NMR:** (DMSO-*d6*, 126 MHz) δ 171.7, 169.9, 165.2, 150.0, 139.7, 138.5, 130.3, 128.3, 126.9, 125.9, 125.4, 120.2, 117.5, 114.6, 44.1

**2D NMR:** HSQC, HMBC

**HRMS:** (ESI+) *m/z* calc. for [C16H14ClN3O4+H]+: 348.0746, found 348.0755 (Δ: 2.6 ppm)

**MS:** (ESI-) *m/z* 693 [2M-H]-, 346 [M-H]-.

## Synthesis of 1-(2-((2-carboxy-4-(2-(3,5-dinitrophenyl)-4-oxo-3,4-dihydroquinazolin-6-yl)phenyl)amino)-2-oxoethyl)-1,4-diazabicyclo[2.2.2]octan-1-ium chloride (21)

**Fig. S10. Synthesis sequence for compound 21.**

### Synthesis of 3,5-dinitrobenzaldehyde (**20a**)

Step 1 – Reduction of 3,5-dinitrobenzoic acid (**20c**) to 3,5-dinitrobenzyl alcohol (**20b**)

The process of selective reduction of 3,5-dinitrobenzoic acid to 3,5-dinitrobenzyl alcohol was adapted from the work of Falorni and co-workers 3.

In a 2-L 1-neck round-bottom flask equipped with a large magnetic stirring bar, 9.6 g (52 mmol) of cyanuric chloride (>99%; Sigma-Aldrich) were dissolved in 500 mL of THF with ca. 9 mL of DIPEA. After approx. 10 minutes of stirring, 10.6 g (50 mmol) of 3,5-dinitrobenzoic acid (99%; Merck KGaA) were added to the reaction mixture and stirring at room temperature was maintained for 2 hours.

A large reflux condenser was adapted to the reaction flask and the mixture was cooled to 0 ºC in an ice/salt bath. In a small beaker, 3 g (79 mmol) of sodium borohydride (99%; Riedel-de Häen) were dissolved in *ca*. 100 mL of distilled water and immediately added through the reflux condenser. The reaction proceeded with extreme violence with the release or large amounts of gas. After 5-10 minutes, 500 mL of diethyl ether were added to the flask, and the aqueous layer was acidified with concentrated HCl. The mixture was allowed to stand, and the organic layer was transferred to an extraction funnel and washed with a 10% (m/v) potassium carbonate solution. This process was repeated two more times before discarding the initial aqueous mixture. The organic extracts were combined, dried over magnesium sulphate and concentrated in the rotary evaporator affording 3,5-dinitrobenzyl alcohol as a yellow powder (5.6 g, 28 mmol, 56.6%). Purity (HPLC): >99%.

Note 1: the aqueous solution of sodium borohydride should be prepared immediately before use and added without delay.

Note 2: the addition of the borohydride solution to the mixture is quite violent, with the evolution of large amounts of gas and solvent boiling. Large-neck flasks or reactors should be used, as well as an efficiently cooled large reflux condenser.

Note 3: addition of the borohydride solution though a side neck of the flask is highly discouraged.

Characterization of **20b**

Data consistent with literature 3. Data provided for convenience.

**Appearance:** yellow solid

**Melting point:** 87-89 ºC (lit. 88-91 ºC; Sigma-Aldrich)

**1H NMR:** (DMSO-*d6*, 300 MHz) δ 8.71 (1H, t, *J* = 2.0 Hz), 8.59 (2H, d, *J* = 2.0 Hz), 5.87 (1H, t, *J* = 5.74 Hz), 4.75 (2H, d, *J* = 5.56 Hz)

**MS:** (ESI+) *m/z* 199 [M+H]+.

Step 2 – Oxidation of 3,5-dinitrobenzyl alcohol (**20b**) to 3,5-dinitrobenzaldehyde (**20a**)

The oxidation of benzylic alcohol to the aldehyde was achieved using pyridinium chlorochromate (PCC) as selective oxidant.

In a 2-L round-bottom flask, 5 g (23 mmol) of 3,5-dinitrobenzyl alcohol (**20b**) were dissolved in 900 mL of dichloromethane. Approximately 5 g of silica gel were added to the mixture followed by 9.5 g (44 mmol, 1.9 eq.) of PCC (98%; Sigma-Aldrich). A reflux condenser was adapted to the flask and the mixture was strongly shaken at room temperature for 3 h. The reaction was monitored by TLC.

The reaction mixture was diluted with 900 mL of diethyl ether and filtered through a silica gel plug (Ø150 x 100 mm). The plug was further washed with 200 mL of ether and the filtrates were combined, dried over magnesium sulphate and concentrated in the rotary evaporator affording 3,5-dinitrobenzaldehyde (**20a**) as a brown solid (4.12 g, 21 mmol, 83%). Purity (HPLC): >99%.

Note 1: addition of silica gel to the reaction mixture greatly improved the isolation yield.

Note 2: large volumes of solvent are required to prevent the formation of sludges.

Characterization of **129**

**Appearance:** brown solid

**TLC:** Rf = 0.88 (SiO2, EtOAc/n-hexane 1:1), stain reactive to 2,4-dinitrophenylhydrazine.

**Melting point:** 81-83 ºC (lit. 85-87 ºC 4)

**1H NMR:** (DMSO-*d6*, 400 MHz) δ 10.23 (1H, s), 9.05 (1H, s), 9.03 (2H, s)

**13C NMR:** (DMSO-*d6*, 101 MHz) δ 190.31, 148.62 (2C), 138.11, 128.78 (2C), 122.96

**2D NMR:** HSQC, HMBC

**MS:** (ESI+) *m/z* 197 [M+H]+.

### 2-(2-chloroacetamido)-5-(2-(3,5-dinitrophenyl)-4-oxo-3,4-dihydroquinazolin-6-yl)benzoic acid (**20**)

In a 100-mL round bottom flask, 200 mg (1 mmol) of 3,5-dinitrobenzaldehyde (**20a**), 319 mg (0.9 mmol) of compound **19**, 570 mg (2.2 mmol) of iodine (99.99%; Sigma-Aldrich) and 50 mL of absolute ethanol were mixed. A reflux condenser was adapted, and the mixture was heated to reflux. After 3 hours, the mixture was cooled in an ice bath and filtered. The bright-yellow solid was washed with small portions of ethanol until complete removal of iodine, and vacuum dried (320 mg, 0.61 mmol, 61%). Purity (HPLC): >99%.

Characterization of **20**

**Appearance:** yellow solid

**Melting point:** 146-147 ºC.

**1H NMR:** (DMSO-*d6*, 500 MHz) δ 13.23 (1H, bs), 11.87 (1H, s), 9.42 (2H, d, *J* = 1.36 Hz), 8.98 (1H, s), 8.67 (1H, d, *J* = 8.70 Hz), 8.38 (2H, m), 8.24 (1H, dd, *J* = 1.74, 8.70 Hz), 8.12 (1H, dd, *J* = 1.49, 8.95 Hz), 7.94 (1H, d, *J* = 8.45 Hz).

**13C NMR:** (DMSO-*d6*, 126 MHz) δ 169.1, 165.4, 148.3 (2C), 147.3, 139.6 (2C), 137.4, 135.6, 133.7, 133.2, 132.8, 132.3, 128.9 (2C), 127.9 (2C), 122.8, 121.9, 120.6 (2C), 117.5, 43.5

**2D NMR:** HSQC. HMBC, COSY

**HRMS:** (ESI+) *m/z* calc. for [C23H14ClN5O8+H]+: 524.0604, found 524.0613 (Δ: 1.72 ppm)

**MS:** (ESI-) *m/z* 522 [M-H]-

### 1-(2-((2-carboxy-4-(2-(3,5-dinitrophenyl)-4-oxo-3,4-dihydroquinazolin-6-yl)phenyl)amino)-2-oxoethyl)-1,4-diazabicyclo[2.2.2]octan-1-ium chloride (**21**)

The product obtained in the previous reaction (**20**) was mixed with 230 mg of DABCO dissolved in 5 mL of DMSO and heated to 60 ºC overnight. After cooling to room temperature, the reaction mixture was diluted with 100 mL of ethyl acetate causing the formation of a precipitate that was separated by filtration, washed with small portions of ethyl acetate and diethyl ether and vacuum dried (150 mg, 0.23 mmol, 37.7%). Purity (1H NMR): >90%. Purity (LC-MS): 98.2%.

Note 1: the product is poorly soluble in DMSO, precipitating easily at room temperature.

Note 2: some preparations may still contain 1 molecule of DABCO, which can be removed by additional washing of the product with ethyl acetate:etanol mixtures.

Characterization of **21**

**Appearance:** yellow solid, poorly soluble in DMSO

**1H NMR:** (DMSO-*d6*, 500 MHz) δ 9.45 (2H, d, *J* = 2.03 Hz), 8.99 (1H, t, *J* = 2.03 Hz), 8.54 (1H, d, *J* = 8.50 Hz), 8.47 (1H, d, *J* = 2.41 Hz), 8.40 (1H, d, *J* = 2.16 Hz), 8.18 (1H, dd, J = 2.03, 8.50 Hz), 7.93 (1H, d, J = 8.50 Hz), 7.83 (1H, dd, J = 2.41, 8.50 Hz), 7.21 (0,5H, bs), 6.66 (0.5H, bs), 4.33 (2H, s), 3.62 (6H, t, J = 7.36 Hz), 3.09 (6H, t, J = 7.36 Hz)

**13C NMR:** (DMSO-*d6*, 126 MHz) δ 168.5, 161.1, 148.3 (2C), 147.2, 146.5, 140.1, 138.7 (2C), 135.9, 132.7, 129.1, 128.7 (2C), 127.9 (2C), 126.3, 122.4, 122.8, 122.4, 121.9, 118.5, 63.6, 52.5, 44.6

**2D NMR:** HSQC, HMBC

**HRMS:** (ESI+) *m/z* calc. for [C29H26N7O8]+: 600.1837, found: 600.1857 (Δ: 3.3 ppm)

**HRMS2:** calc for [M-H2O]+: 582.1732, found: 582.1752 (Δ: 3.4 ppm); calc for [M-CO2]+: 556.1939, found: 556.1948 (Δ: 1.6 ppm).

# References

1 Armarego, W. L. F. *Purification of laboratory chemicals / W.L.F. Armarego and D.D. Perrin*. (Butterworth Heinemann, 1996).

2 Kowalewska, M., Kwiecien, H., Smist, M. & Wrzesniewska, A. Synthesis of new benzofuran-2-carboxylic acid derivatives. *J Chem-Ny* (2013). https://doi.org/10.1155/2013/183717

3 Falorni, M., Porcheddu, A. & Taddei, M. Mild reduction of carboxylic acids to alcohols using cyanuric chloride and sodium borohydride. *Tetrahedron Lett* **40**, 4395-4396 (1999). https://doi.org/Doi 10.1016/S0040-4039(99)00734-0

4 Siggins, J. E. 3,5-Dinitrobenzaldehyde. *Org Synth* **53**, 52 (1973). https://doi.org/10.1002/0471264180.os053.13


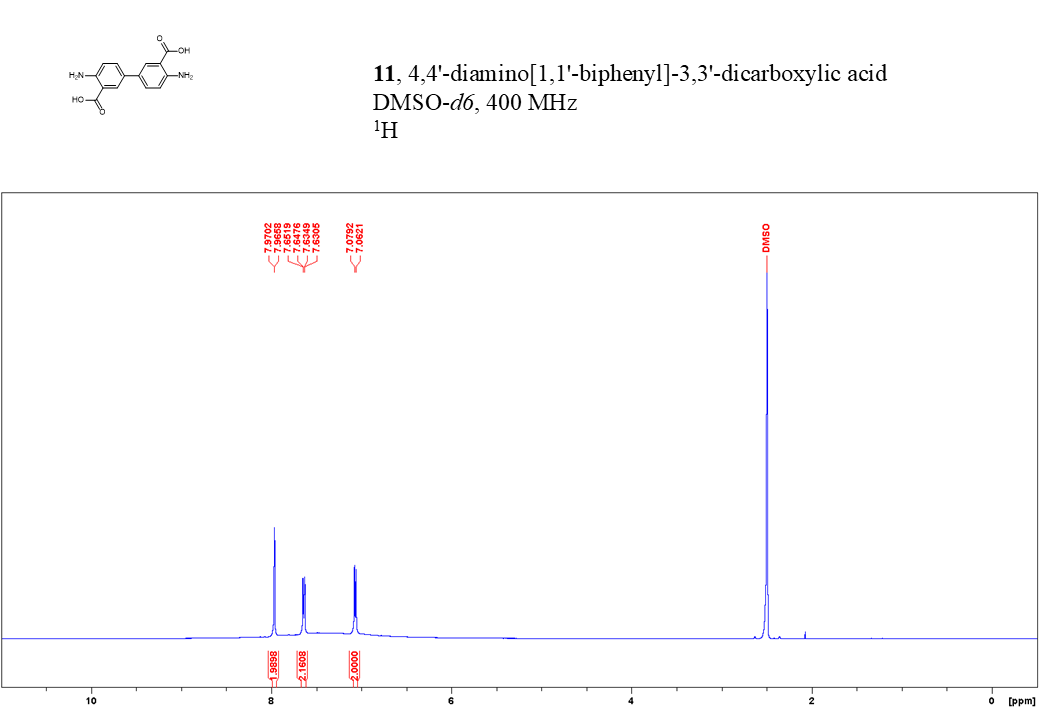


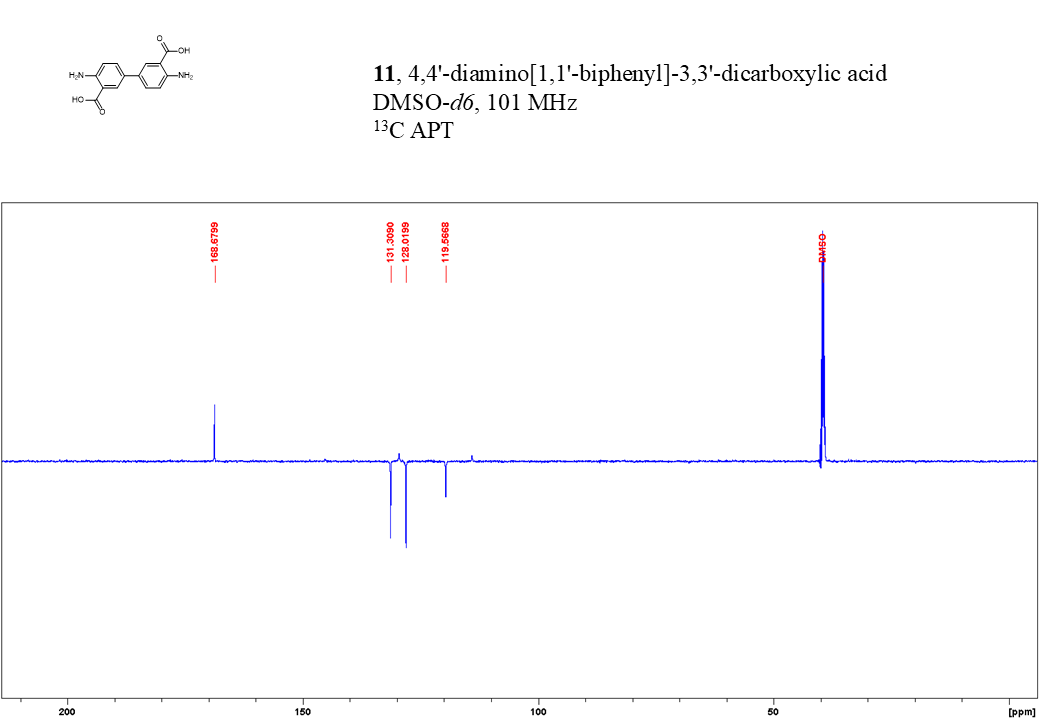


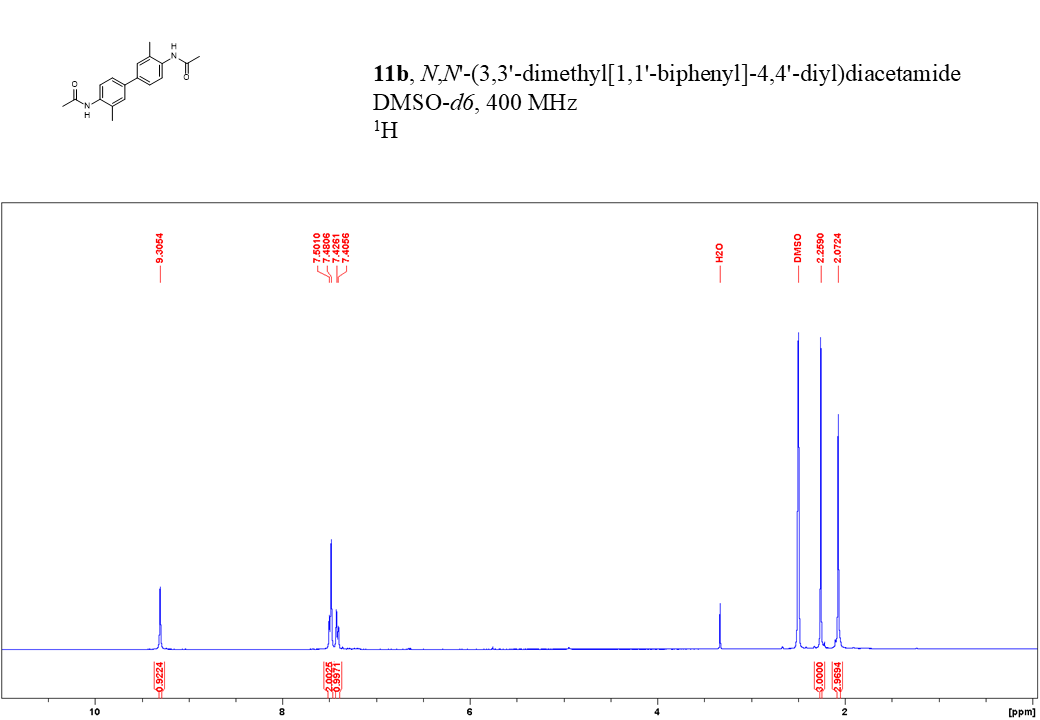


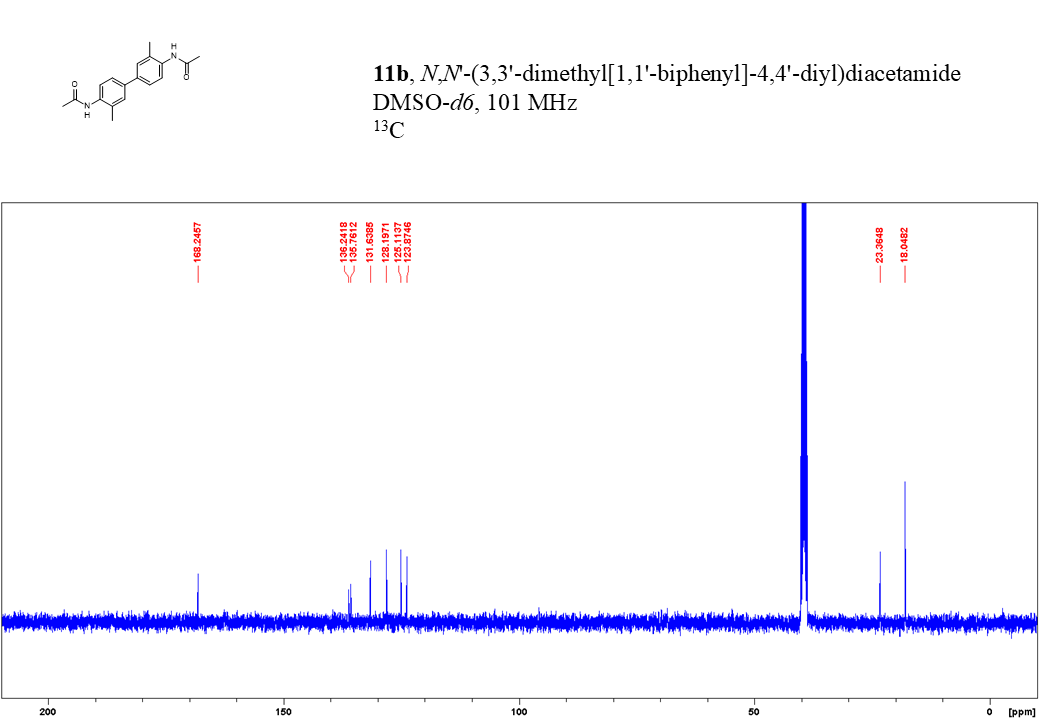


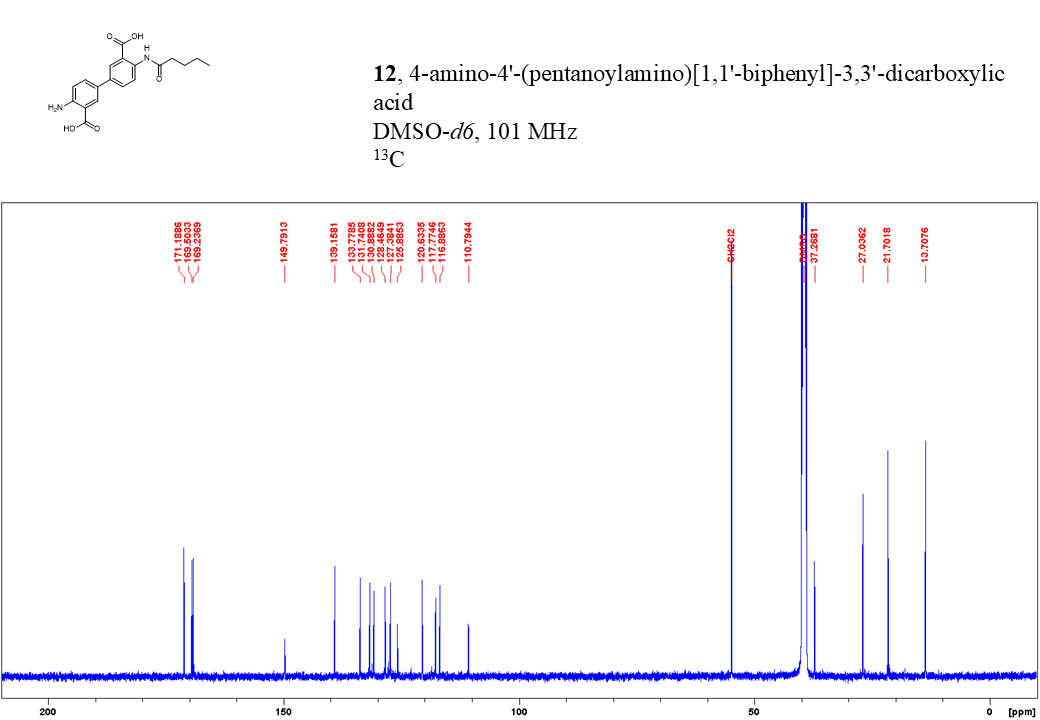

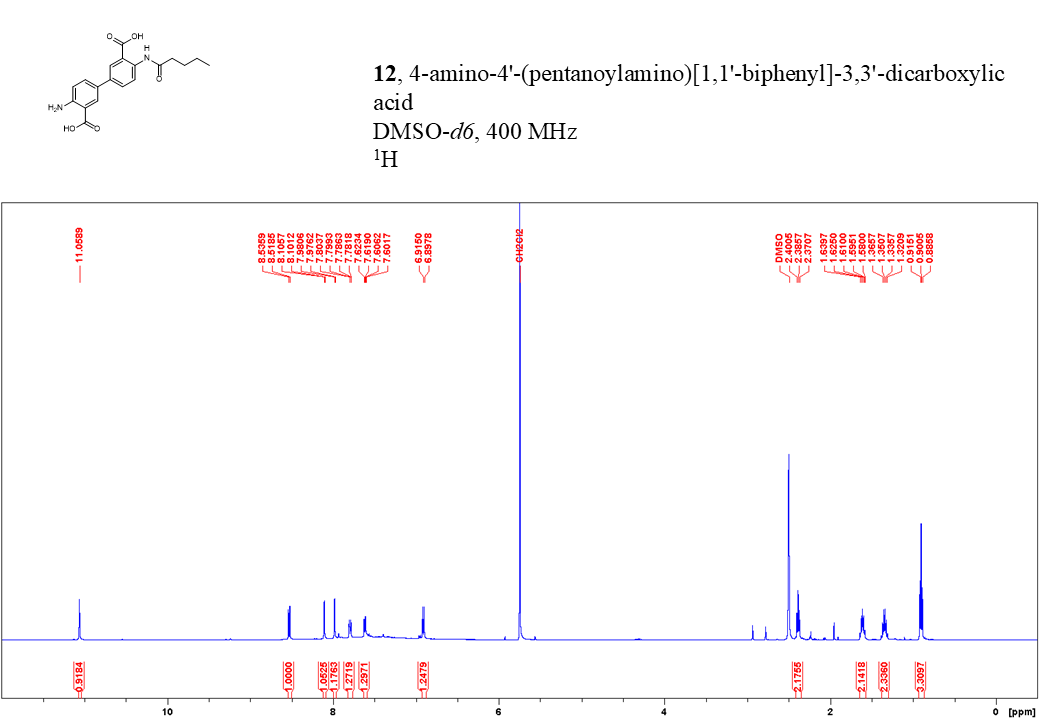


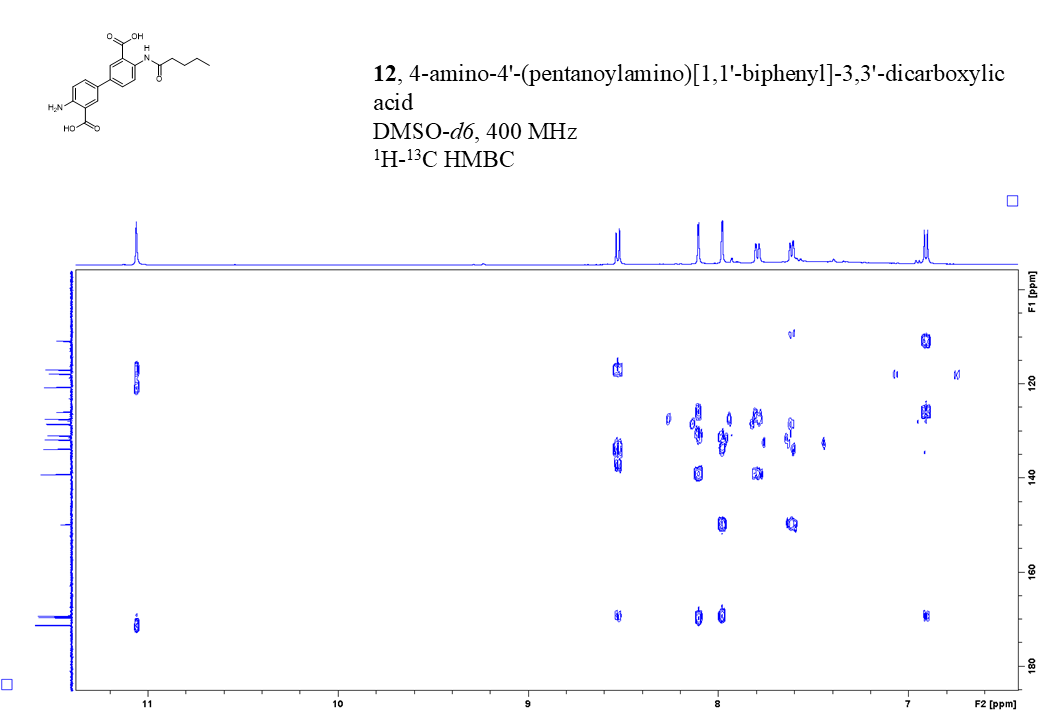


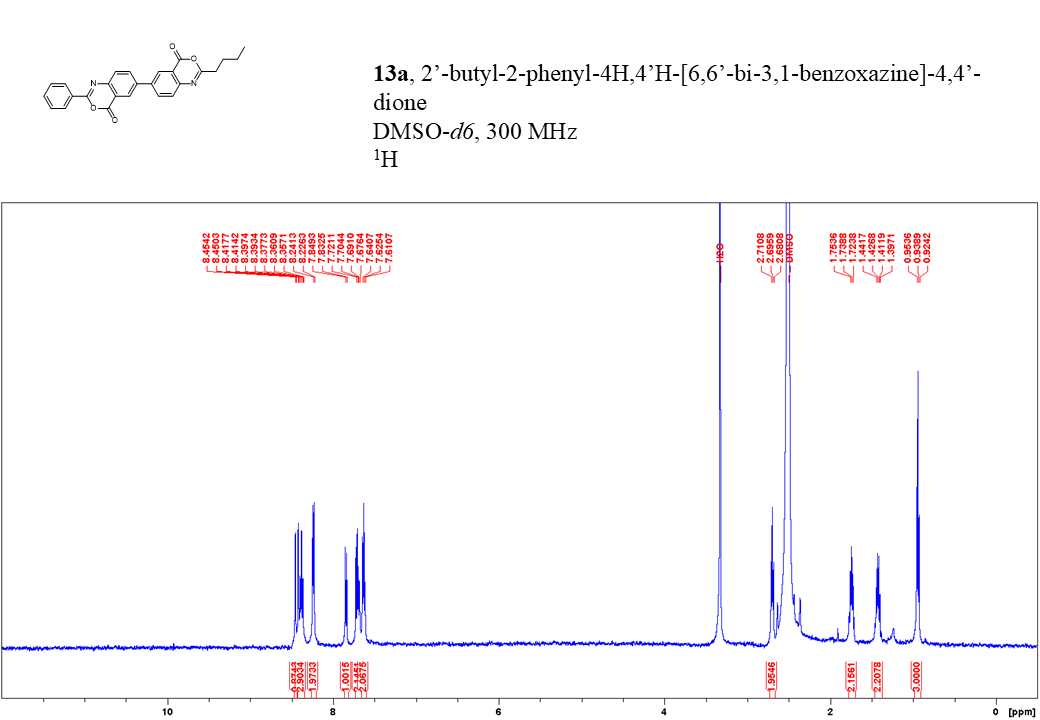


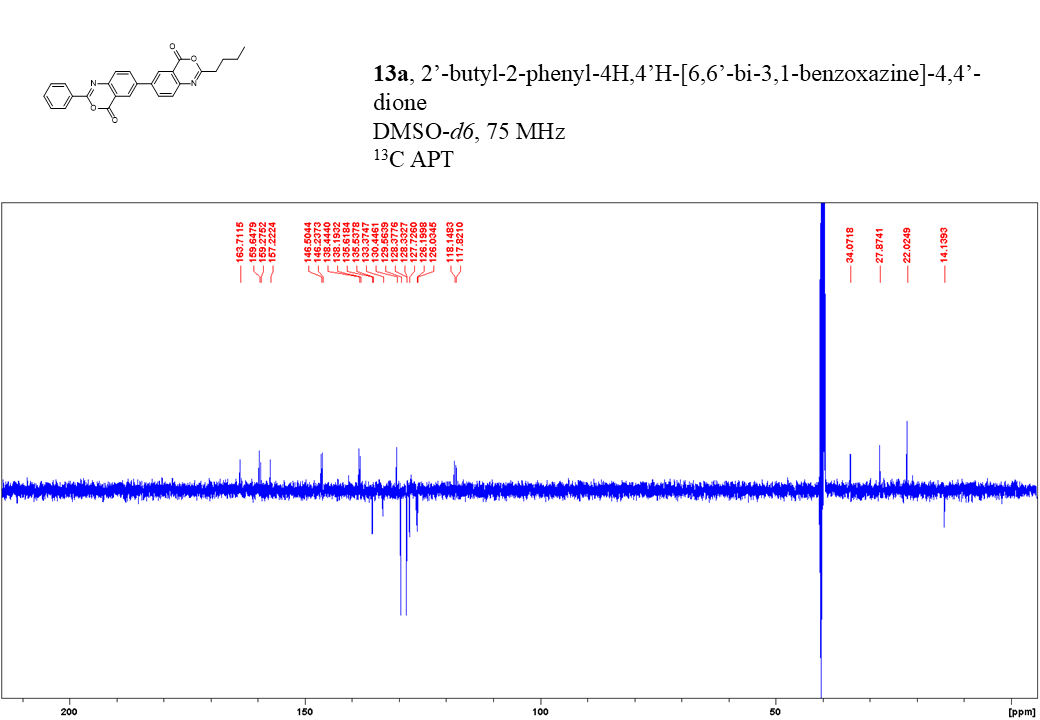


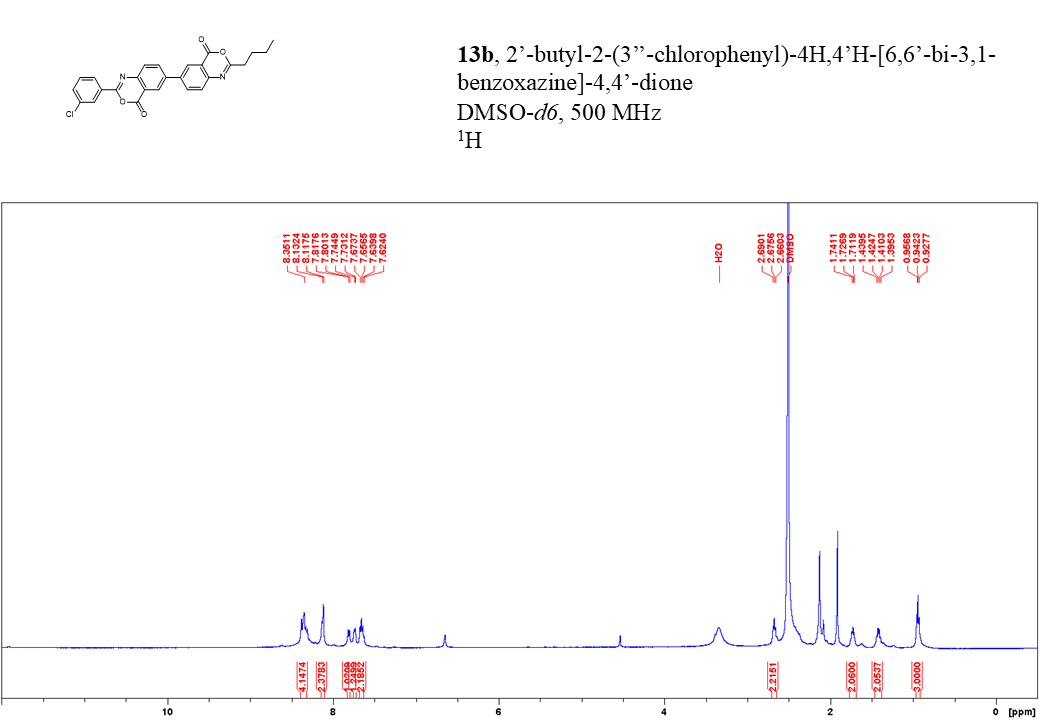


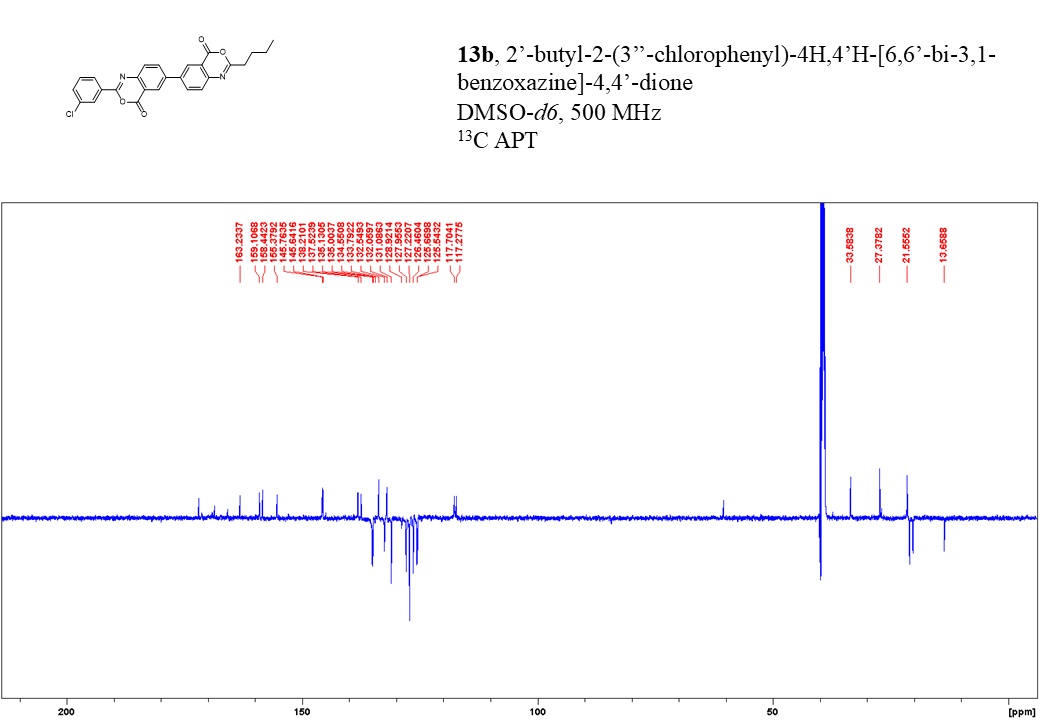


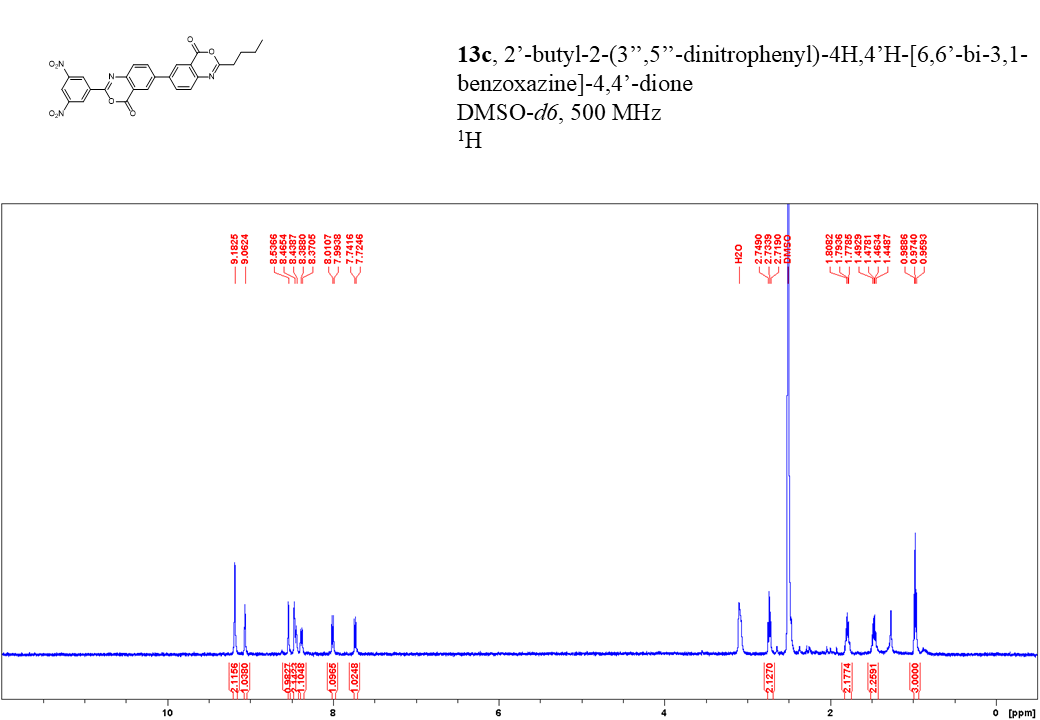


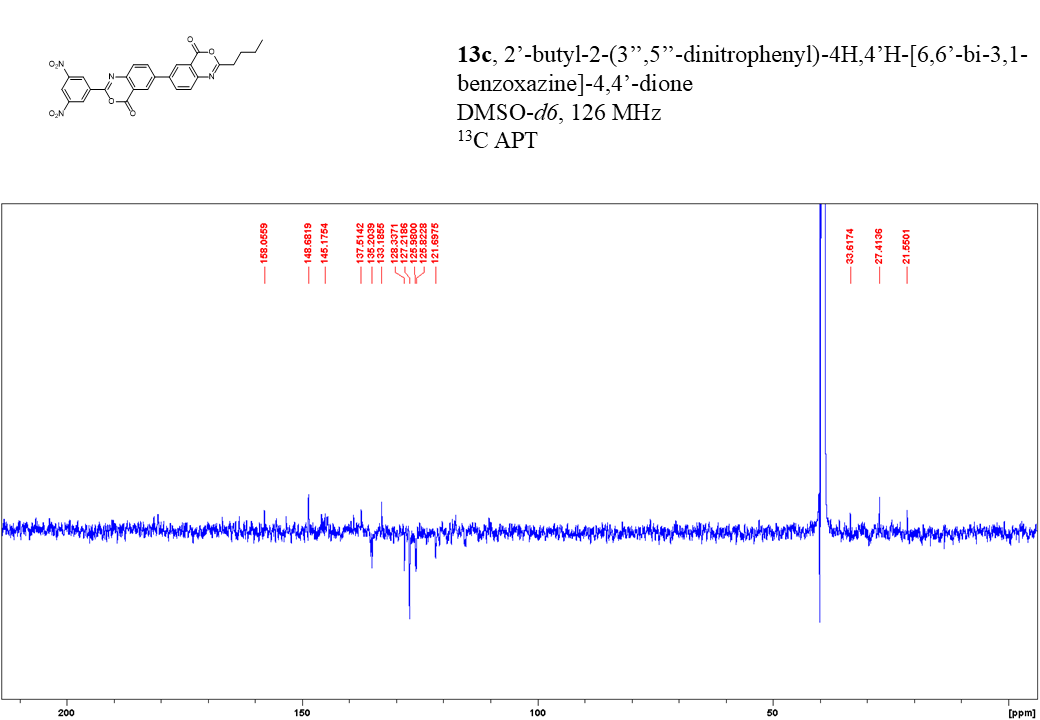


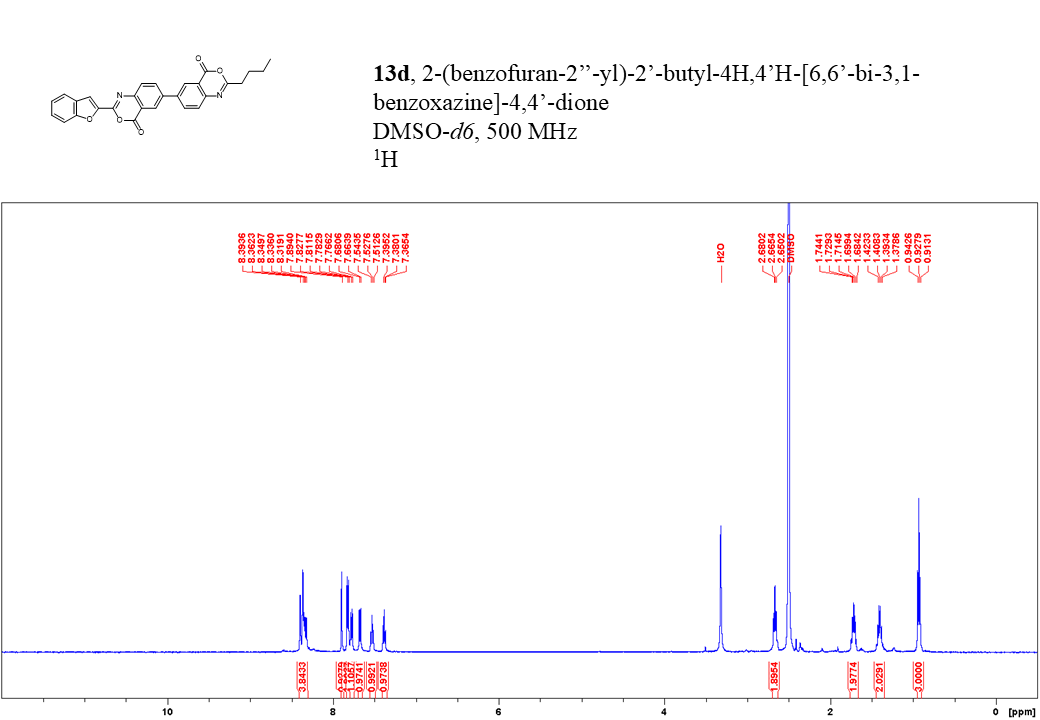


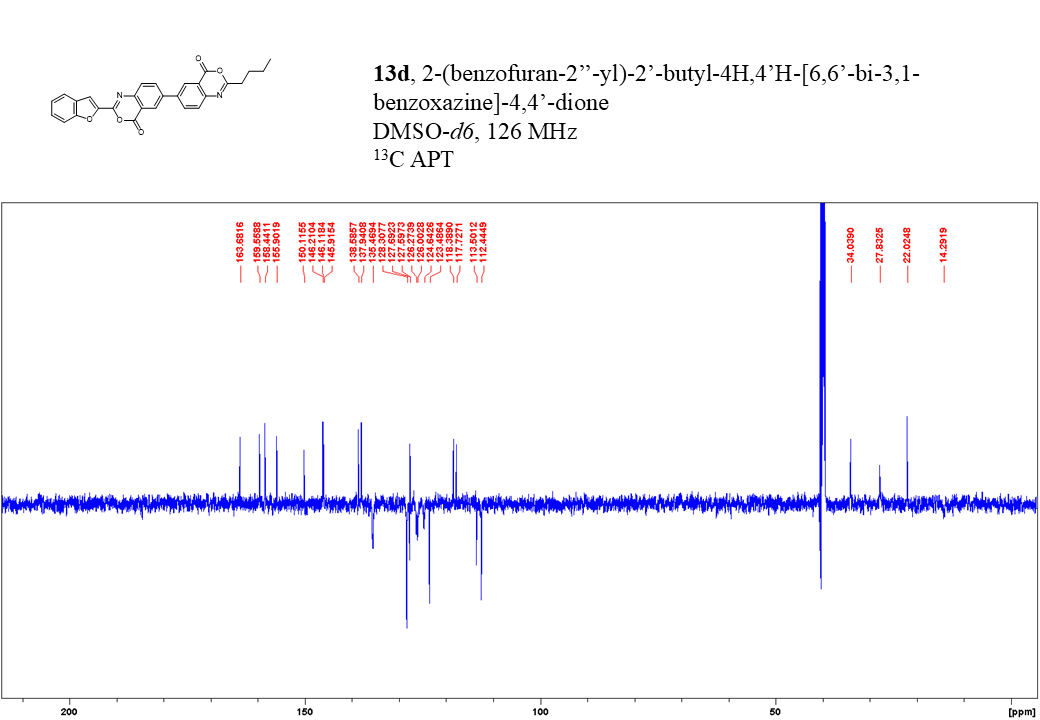


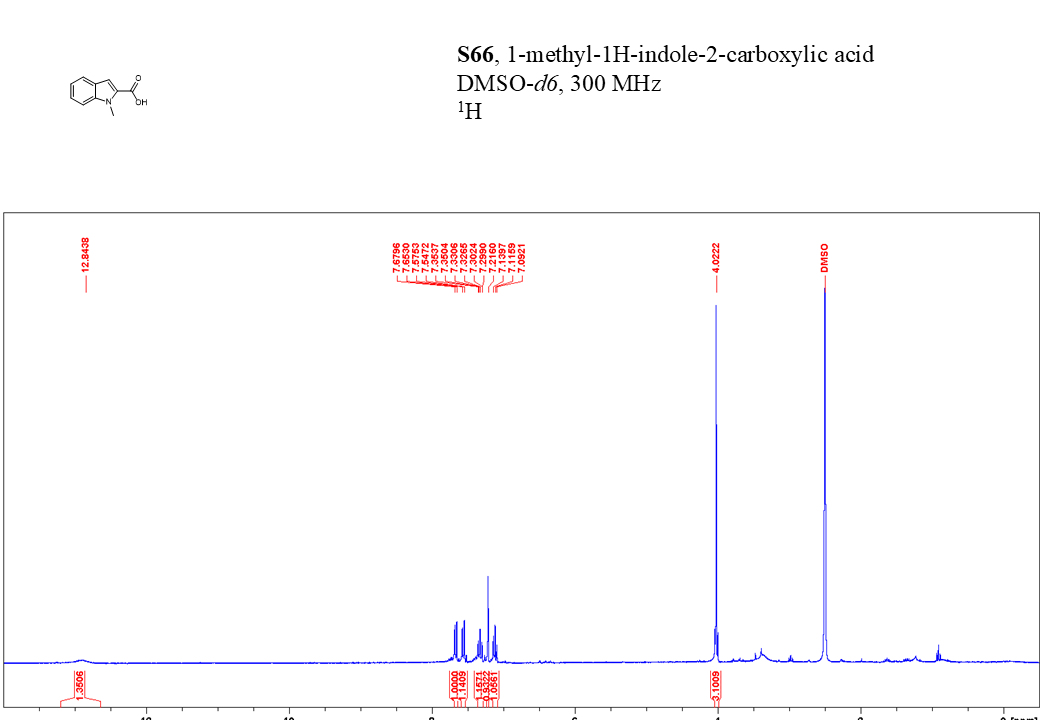


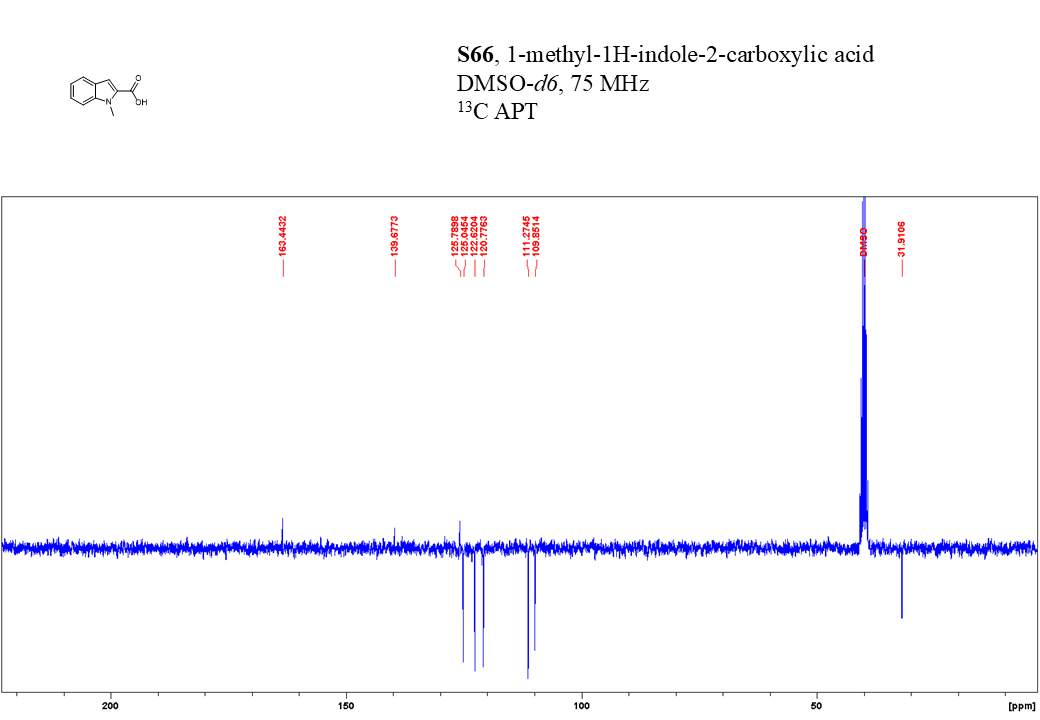


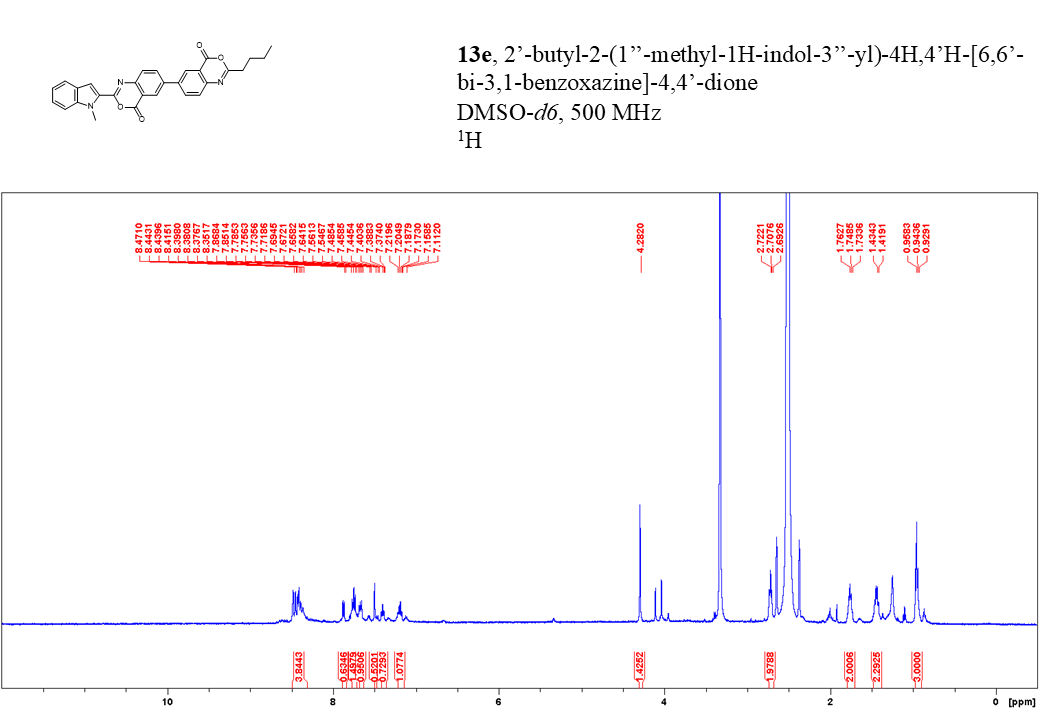


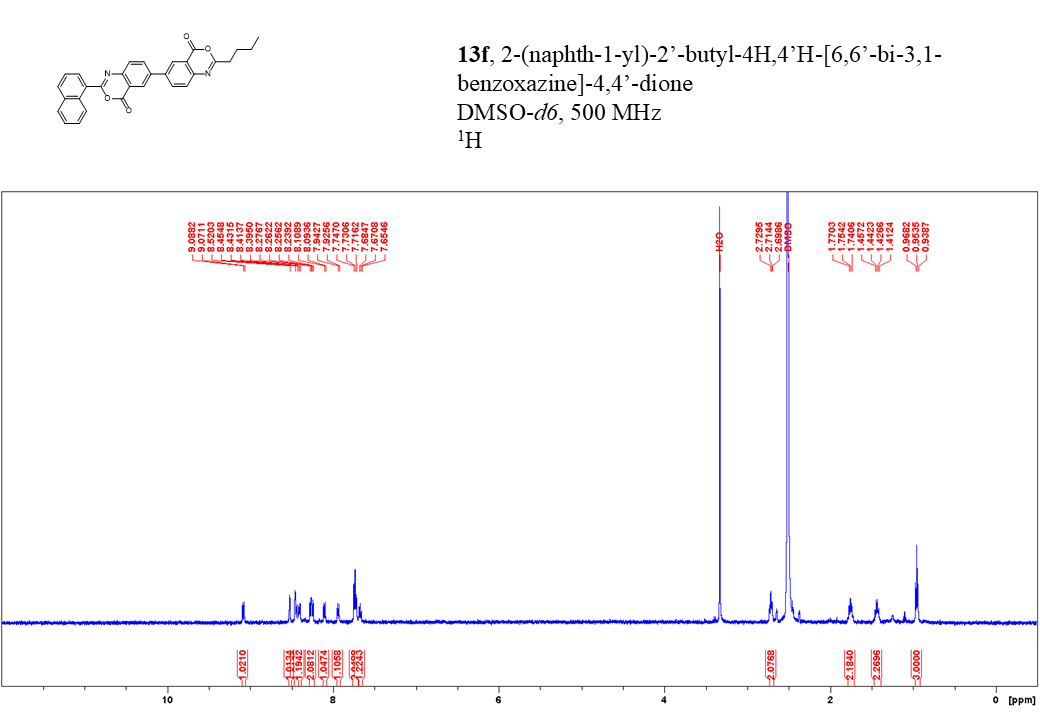


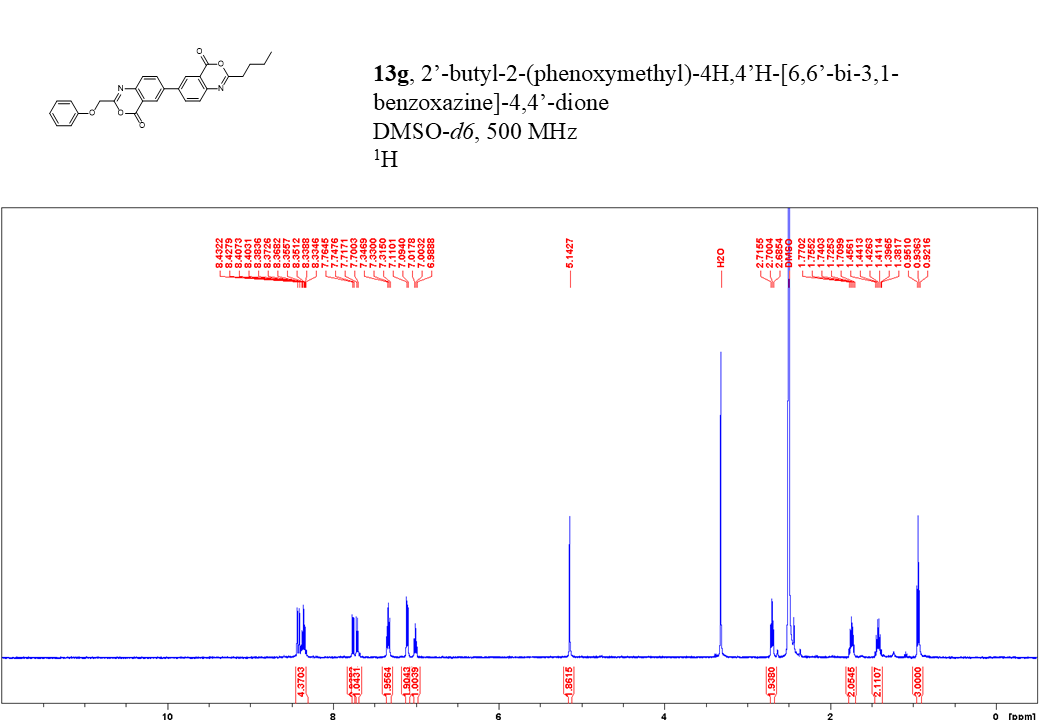


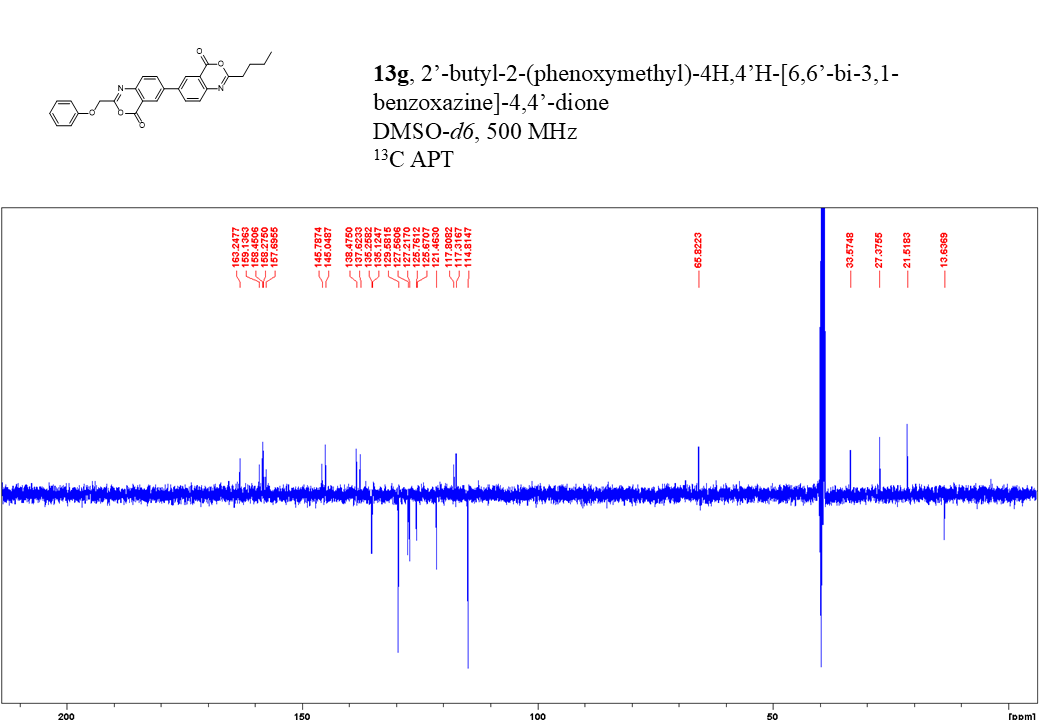


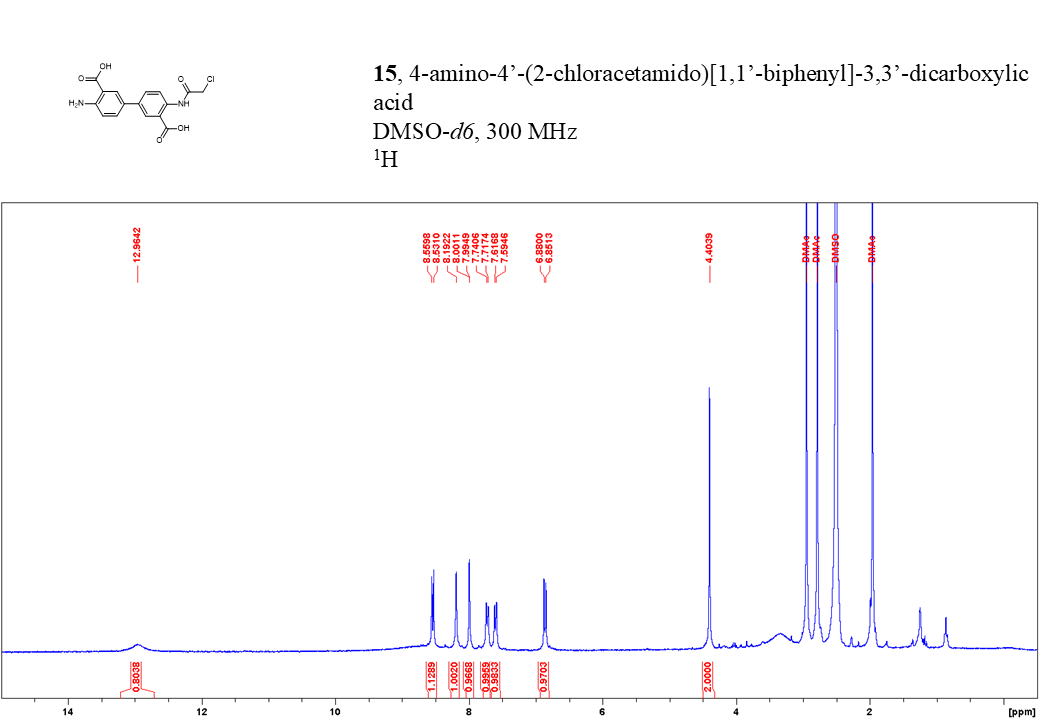


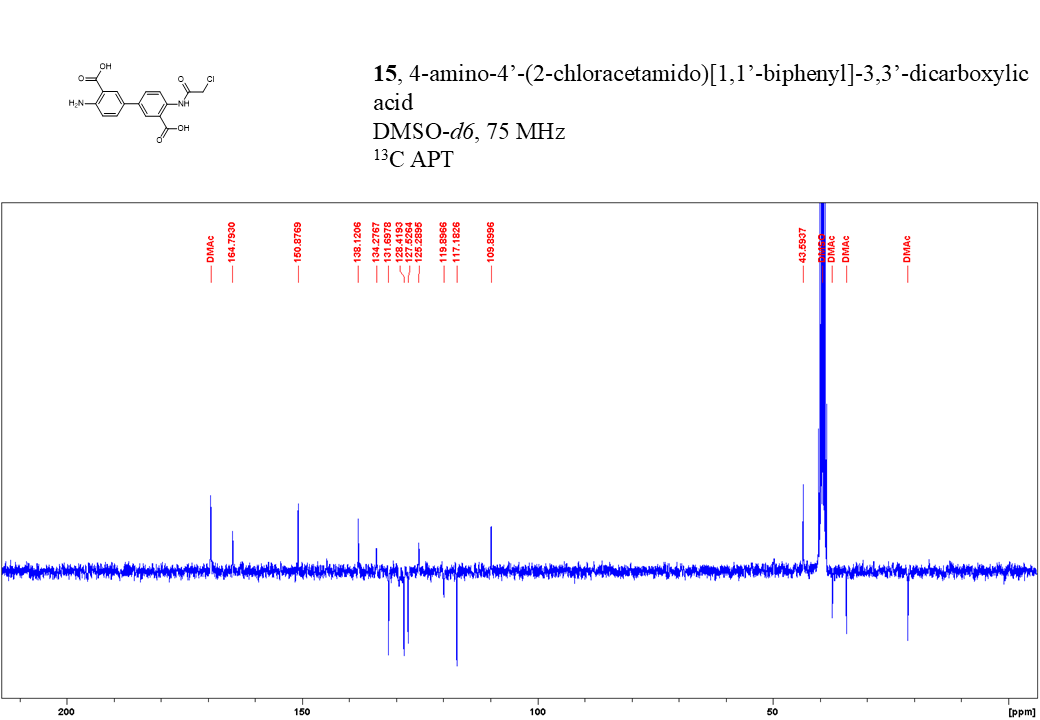


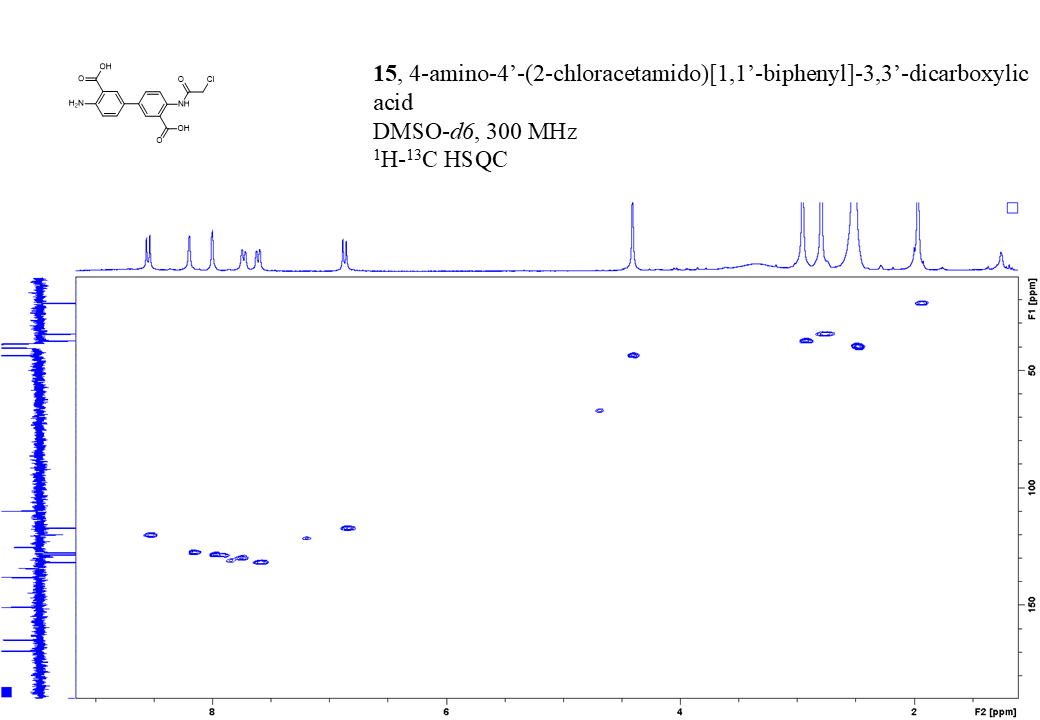


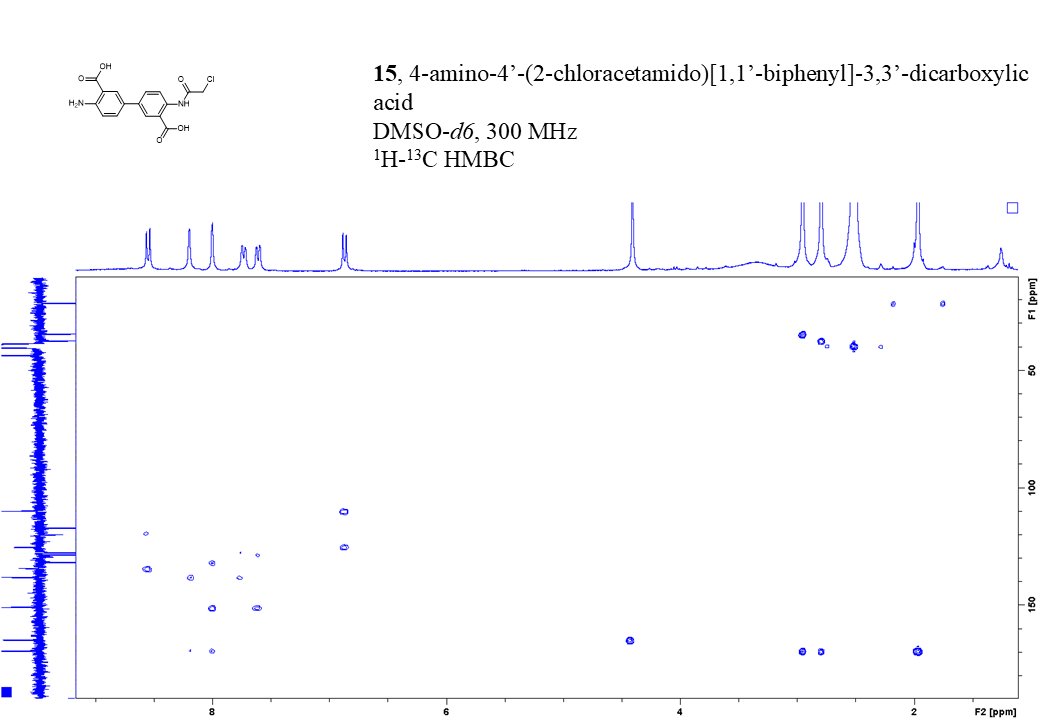


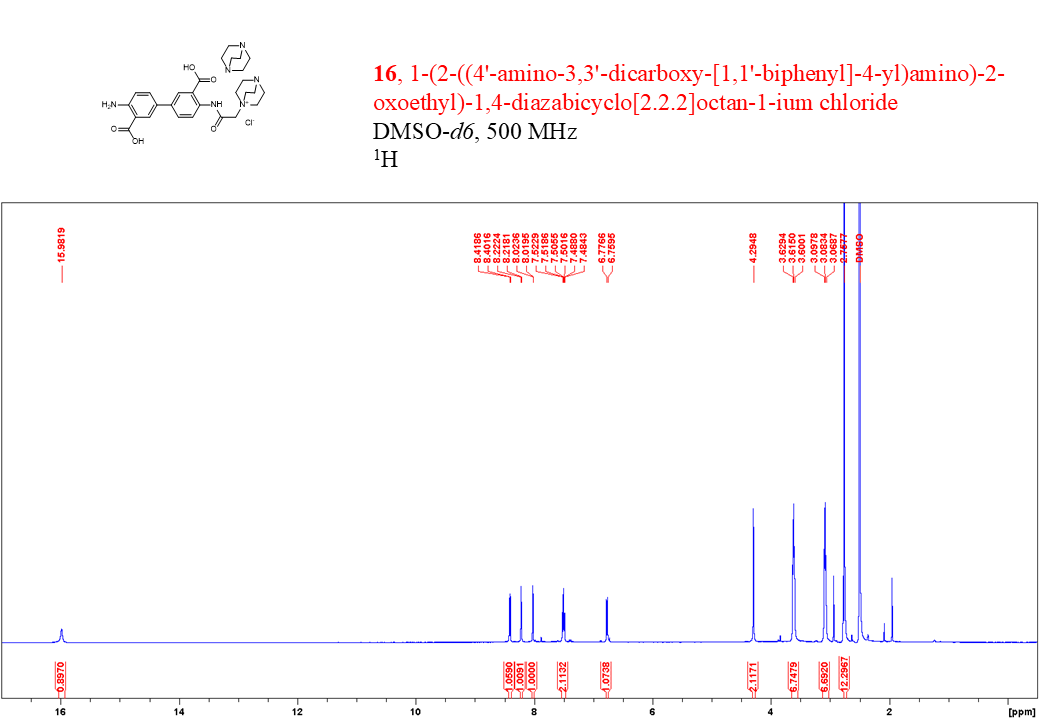


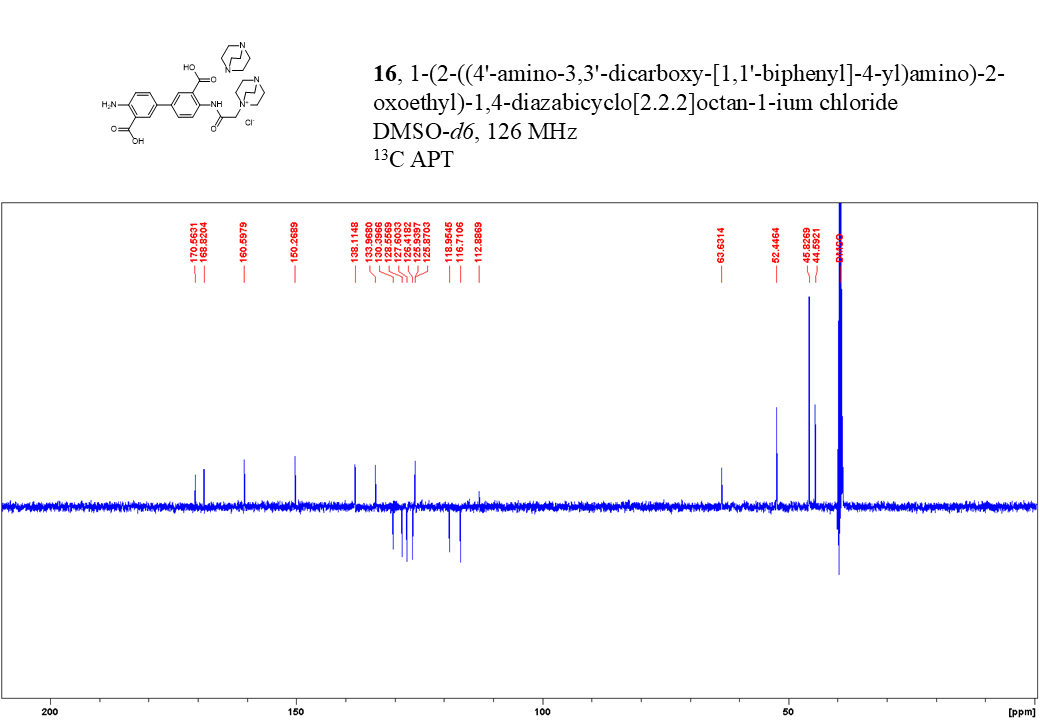


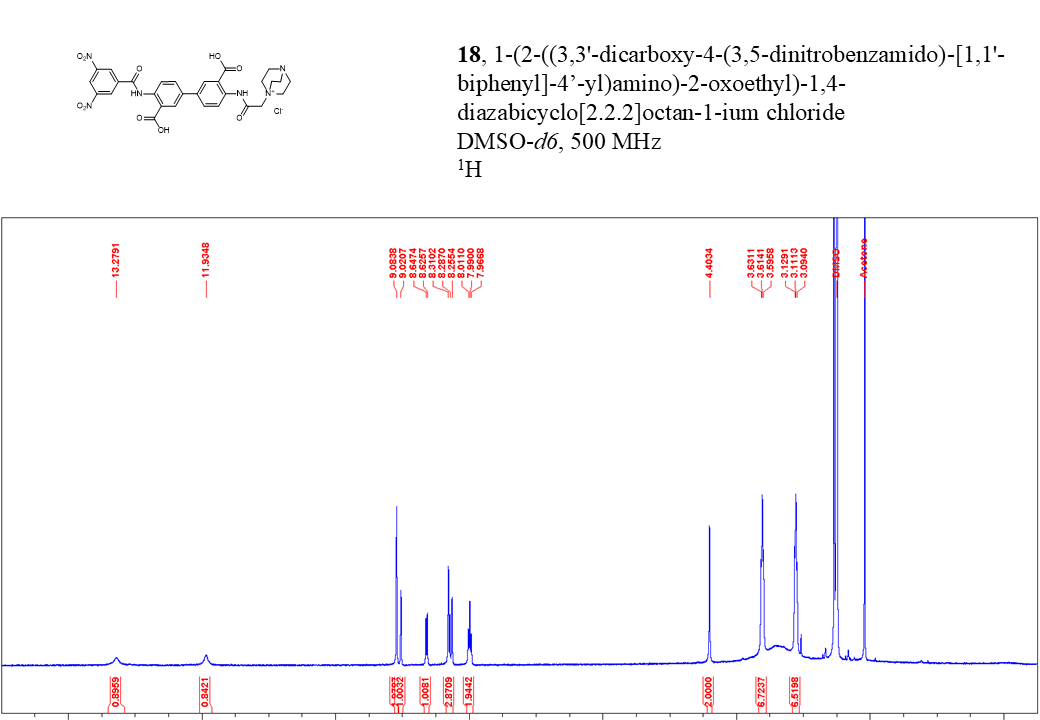


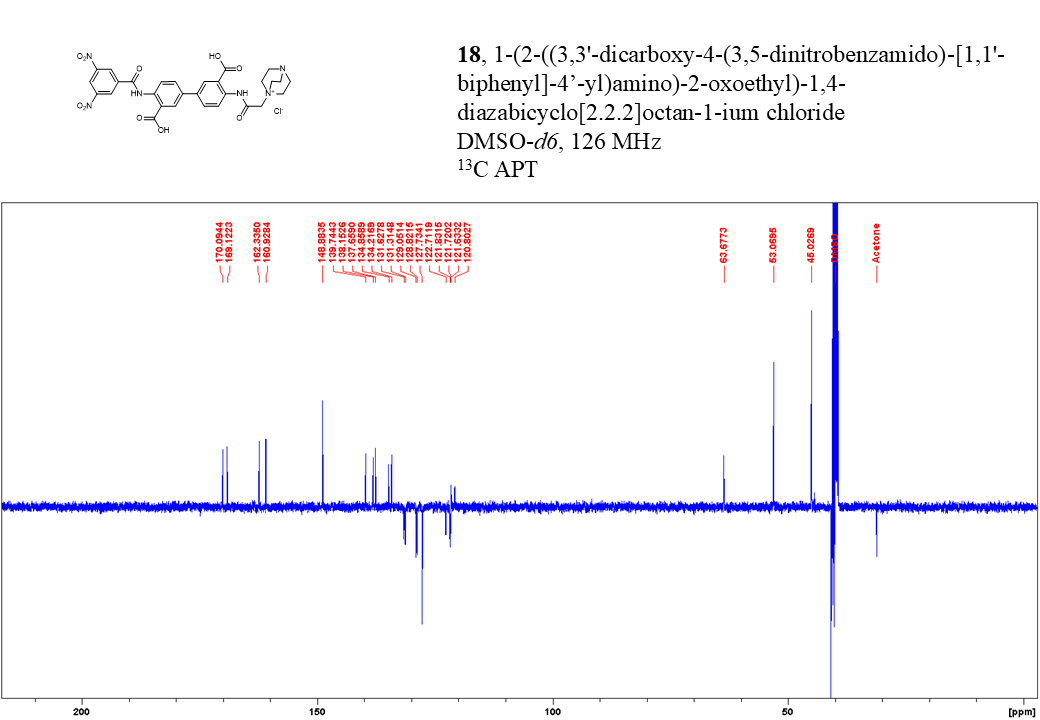


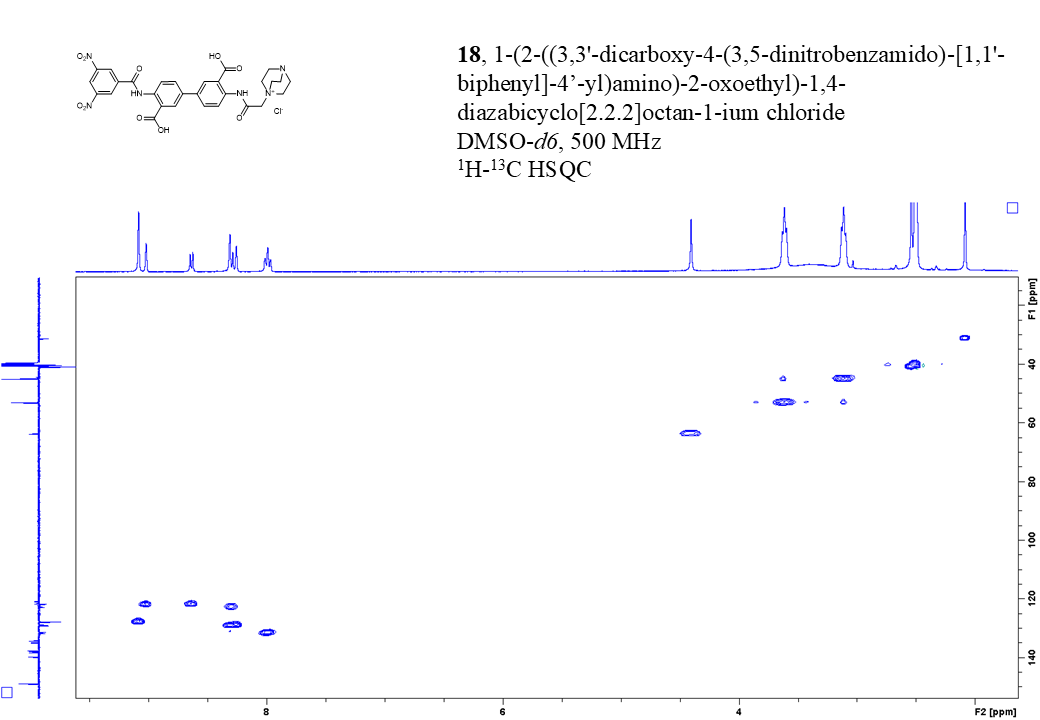


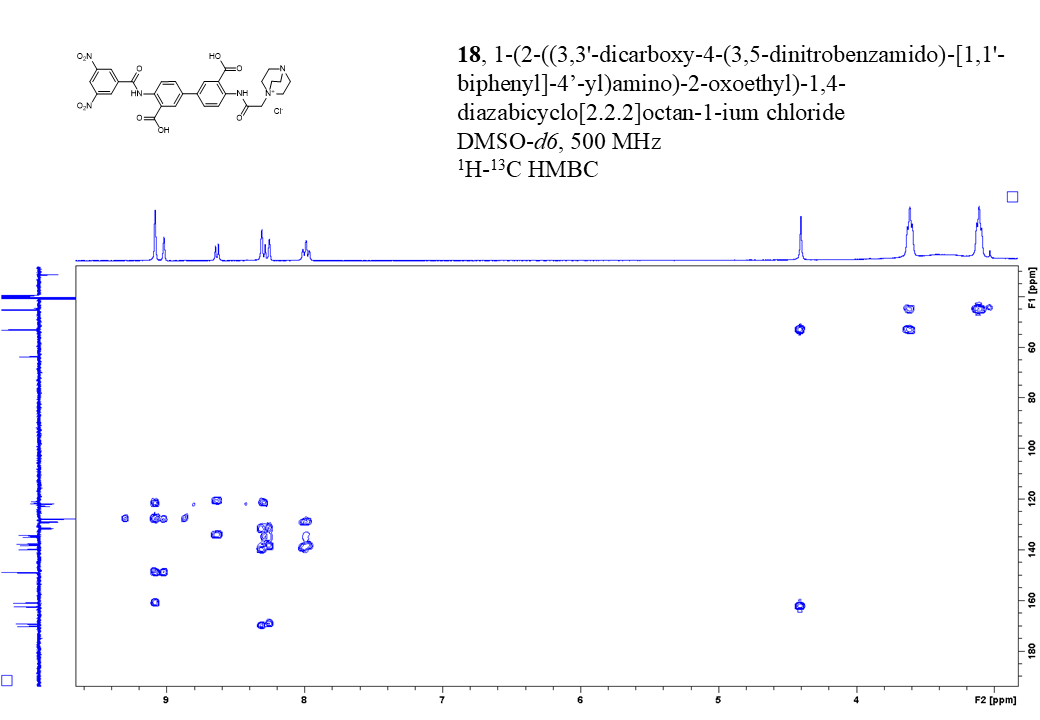


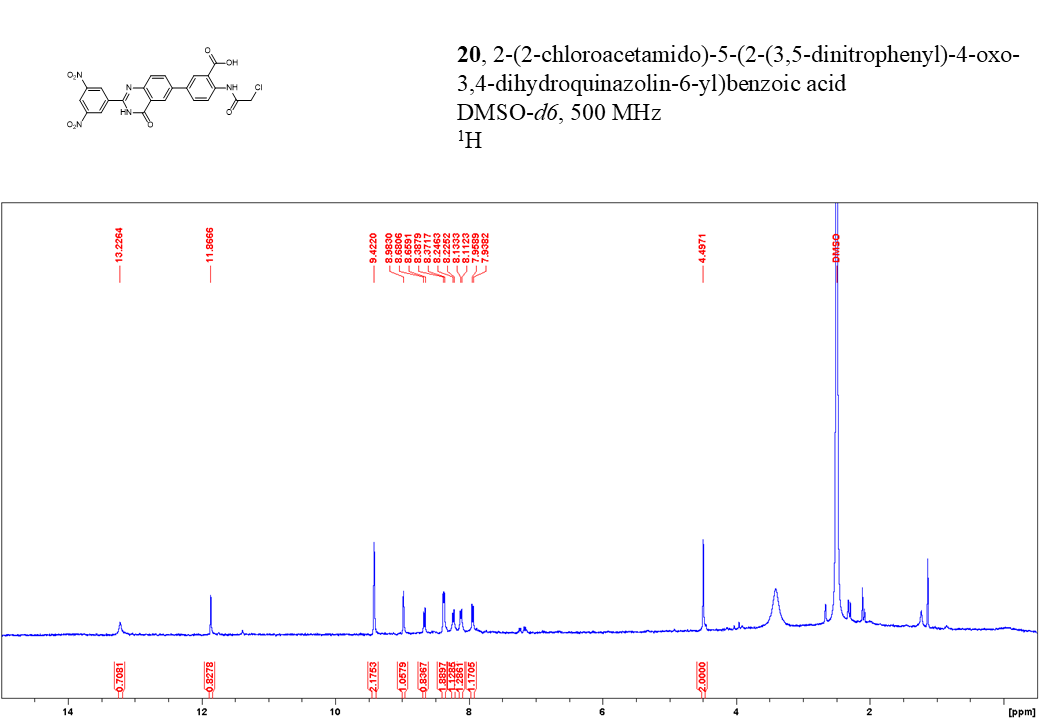


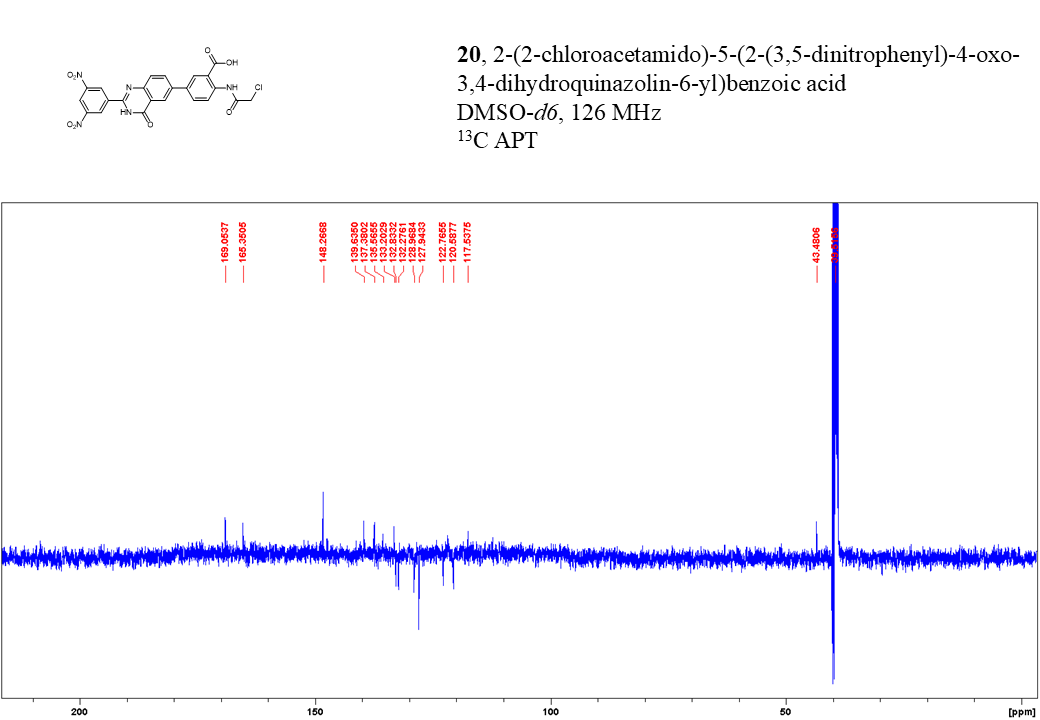


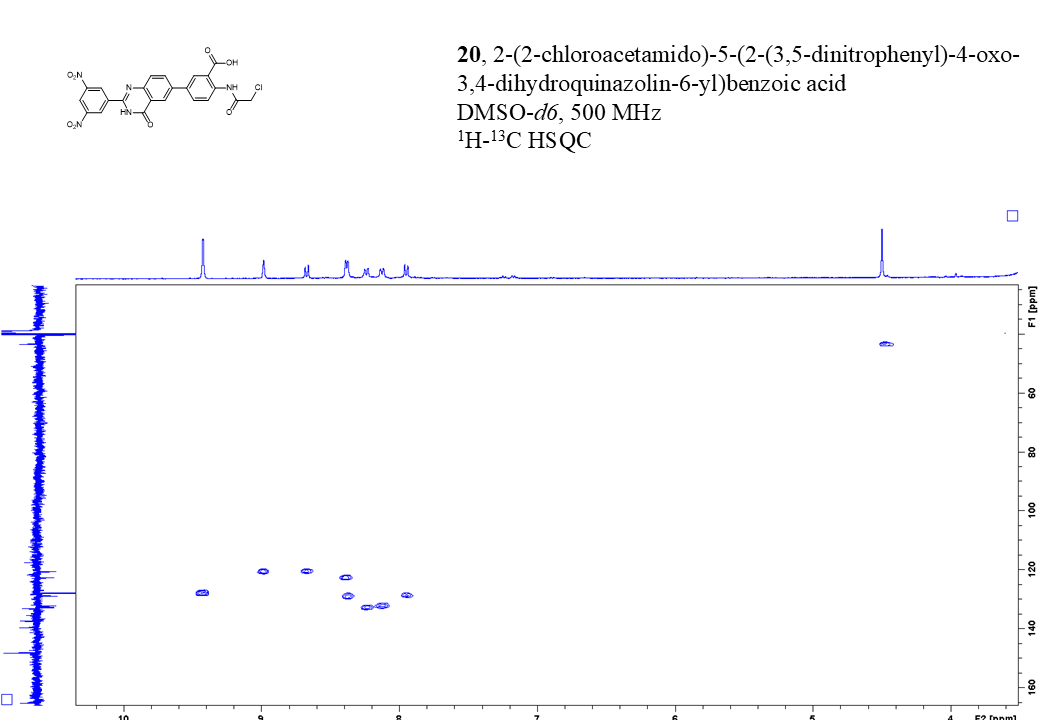


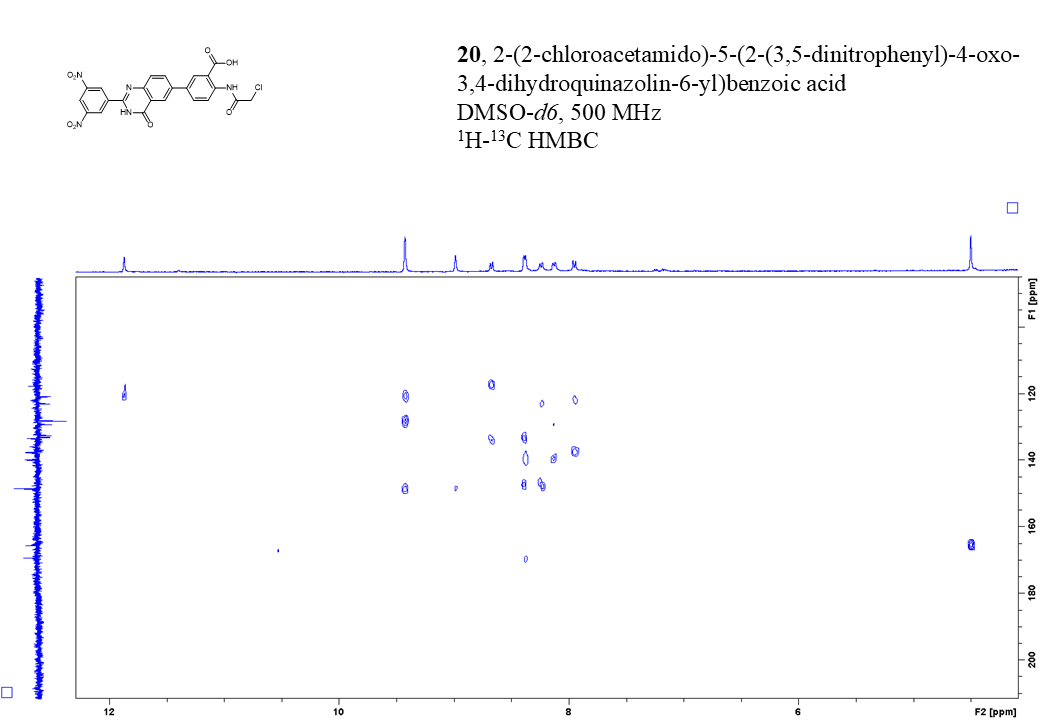


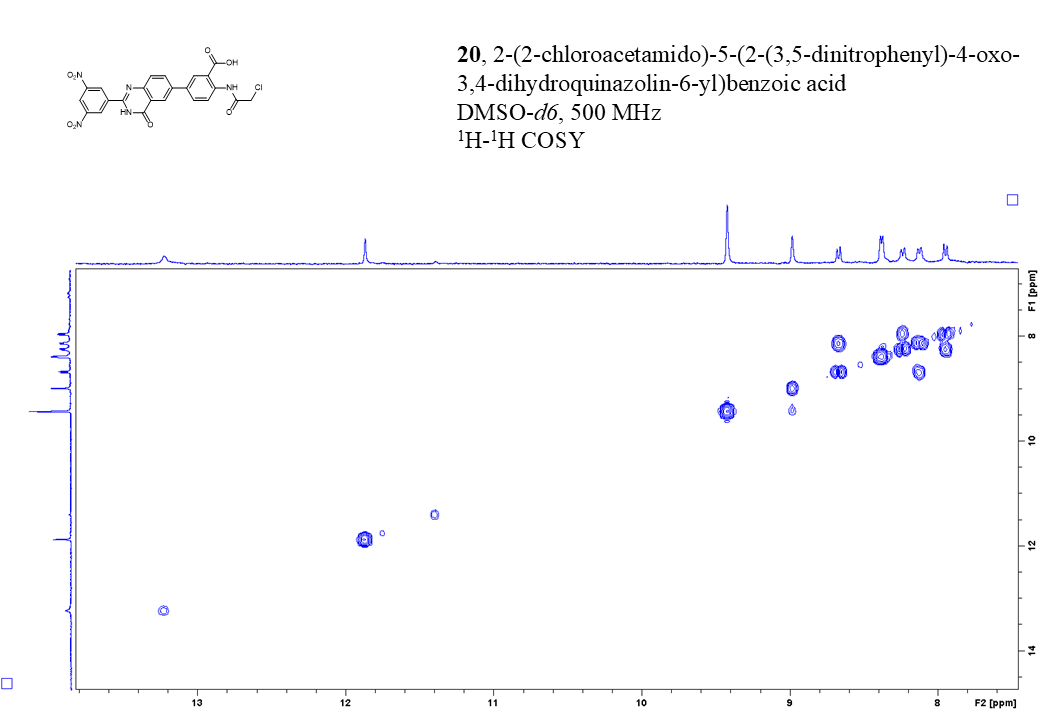


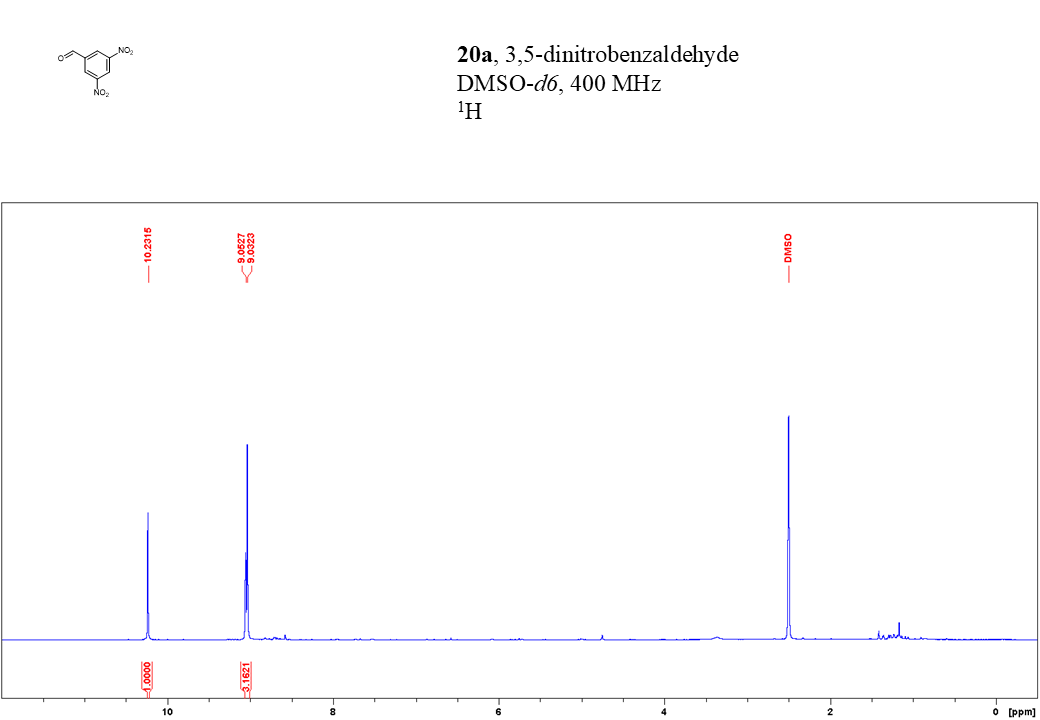


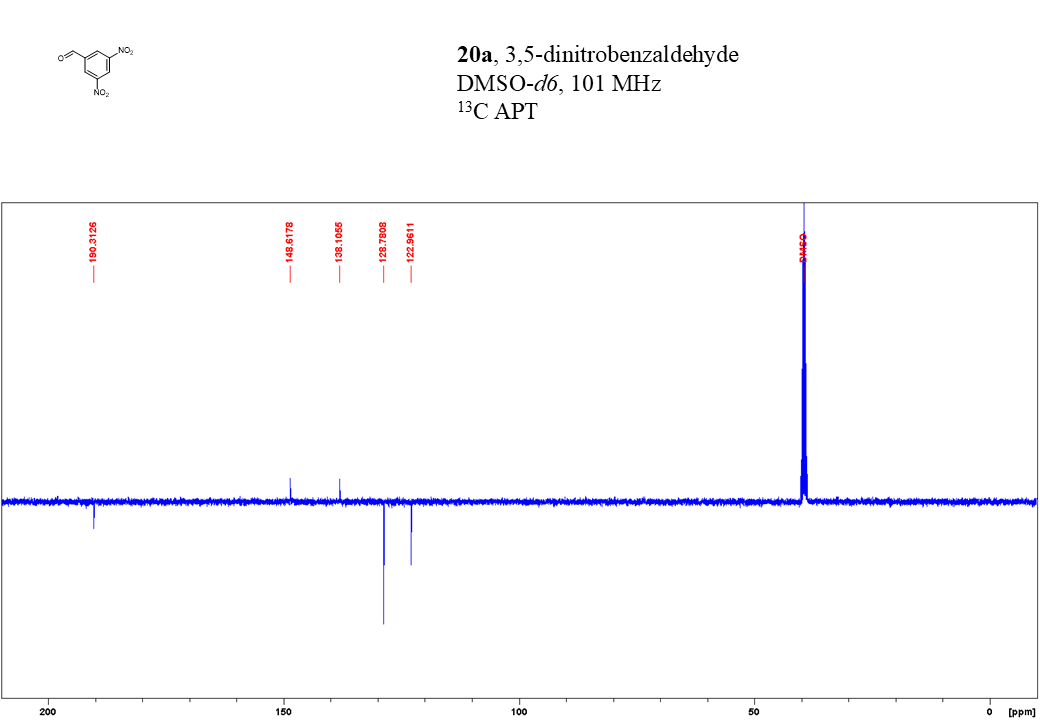


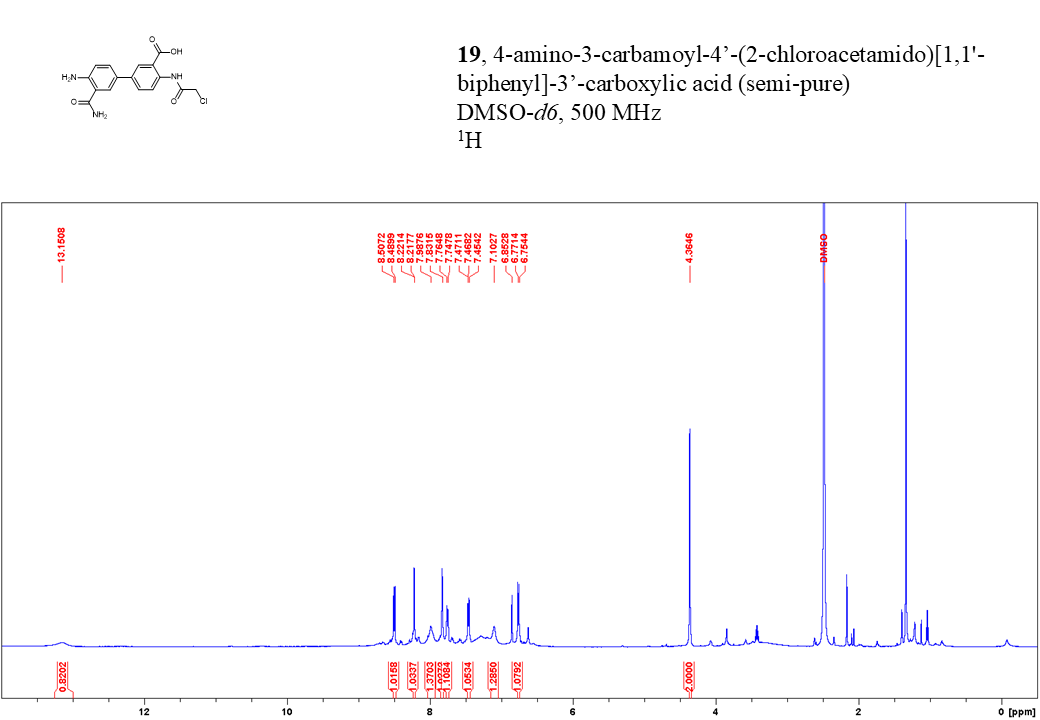


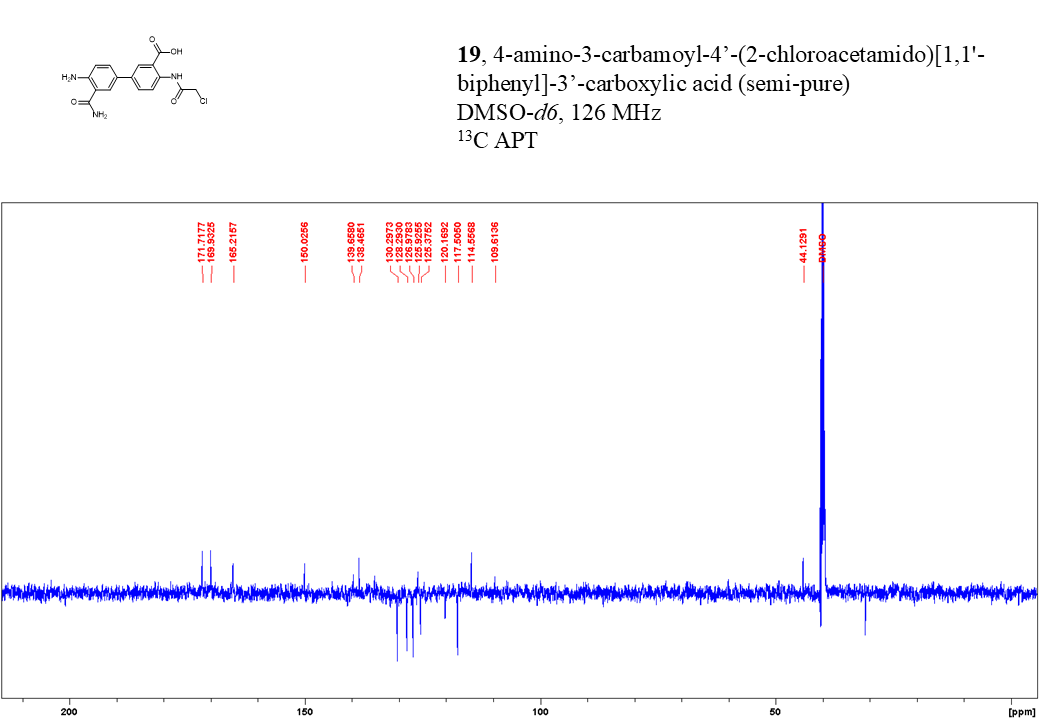


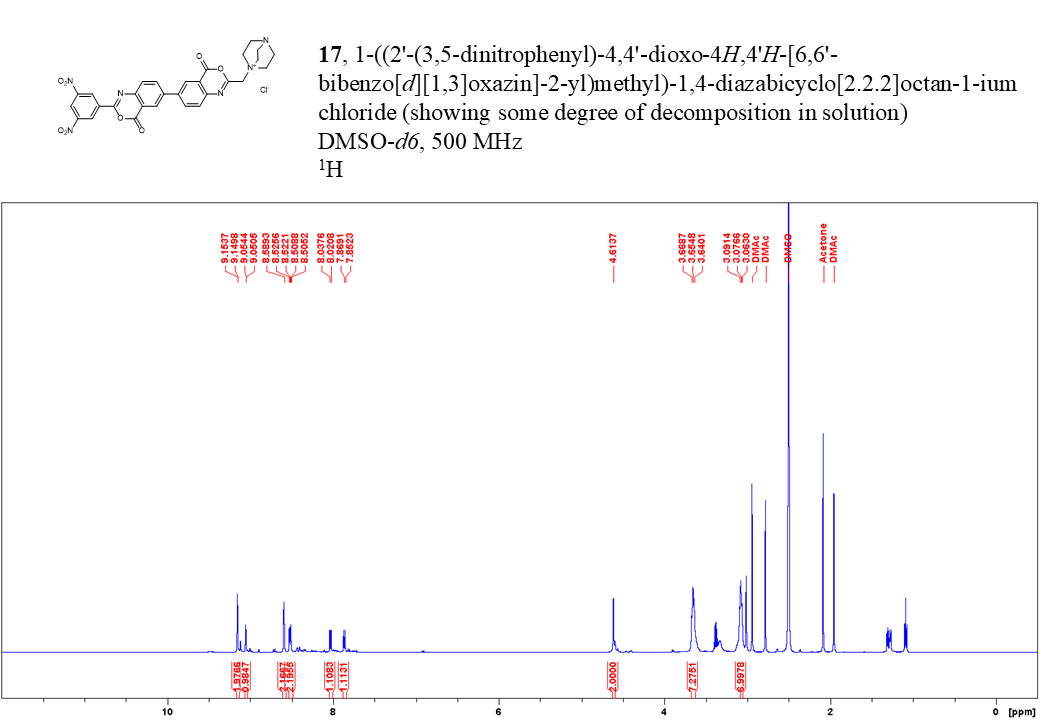


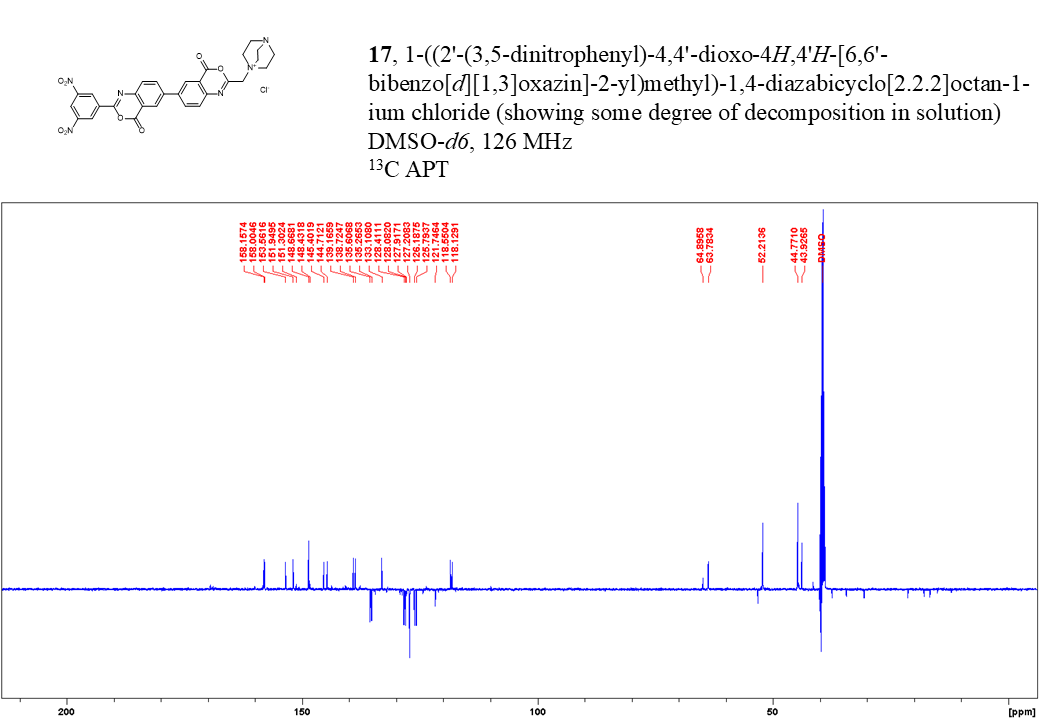


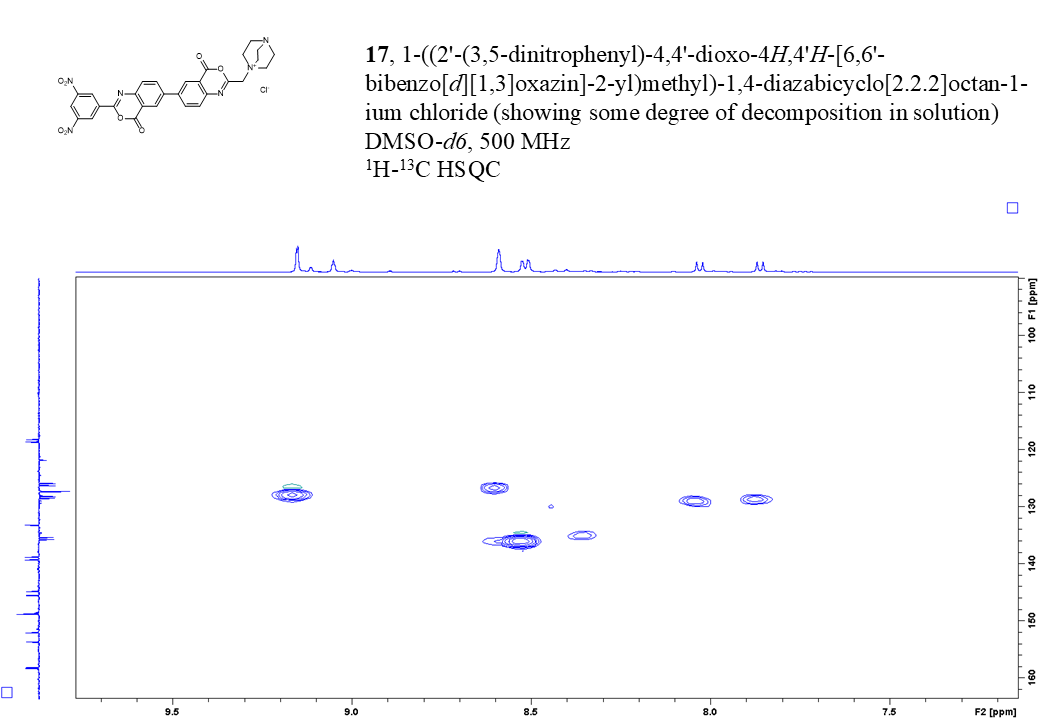


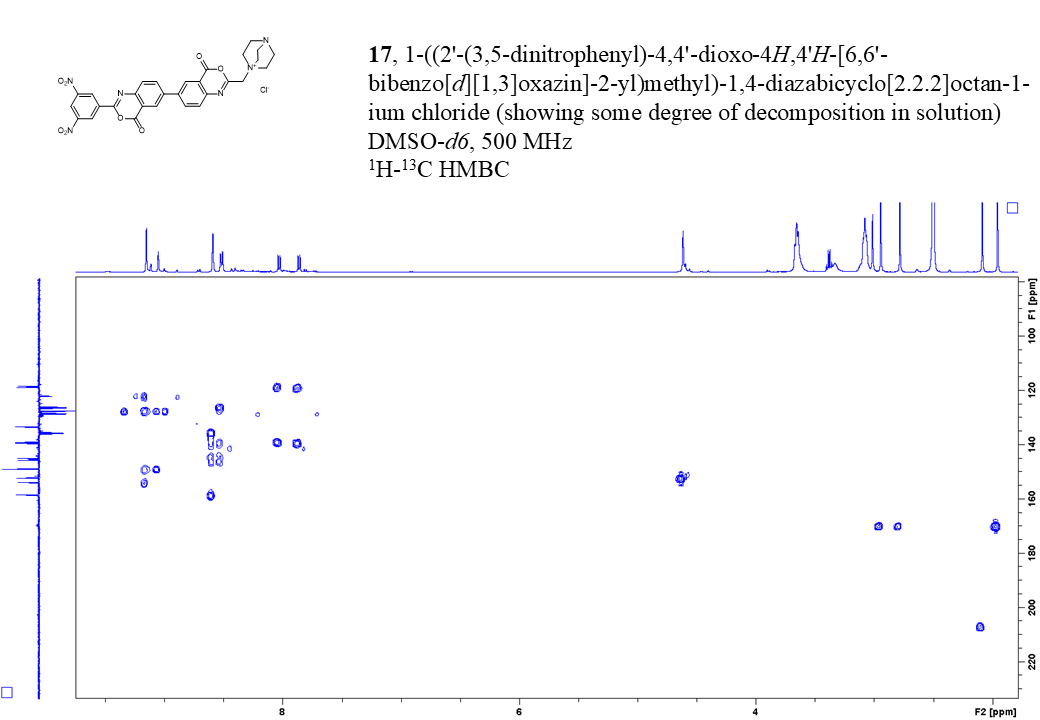


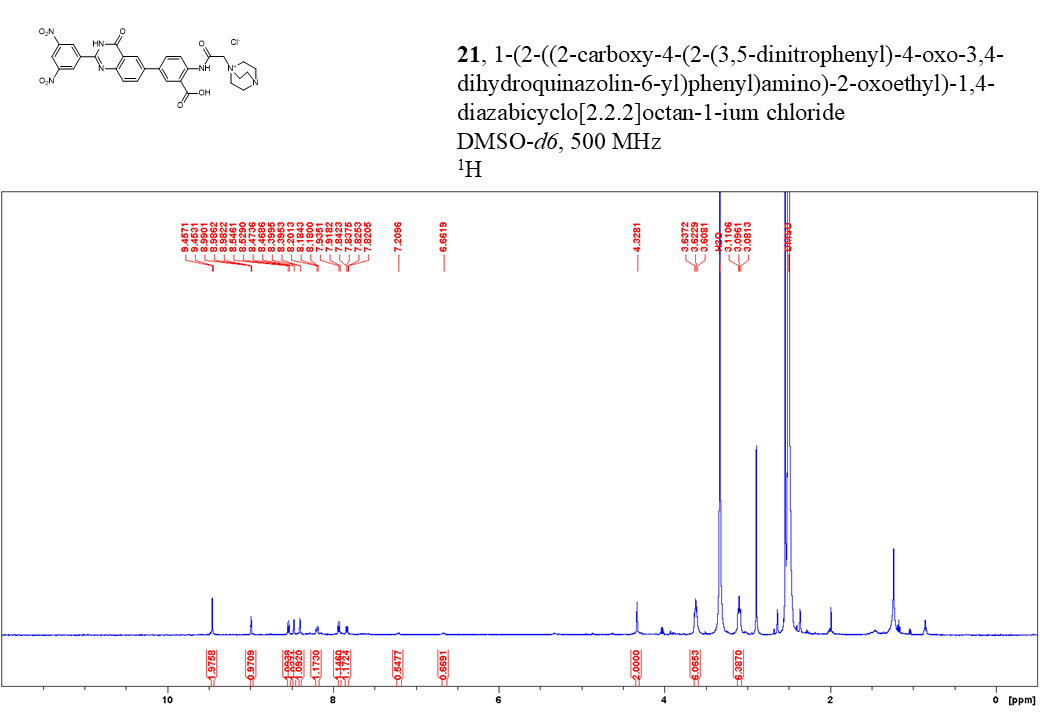


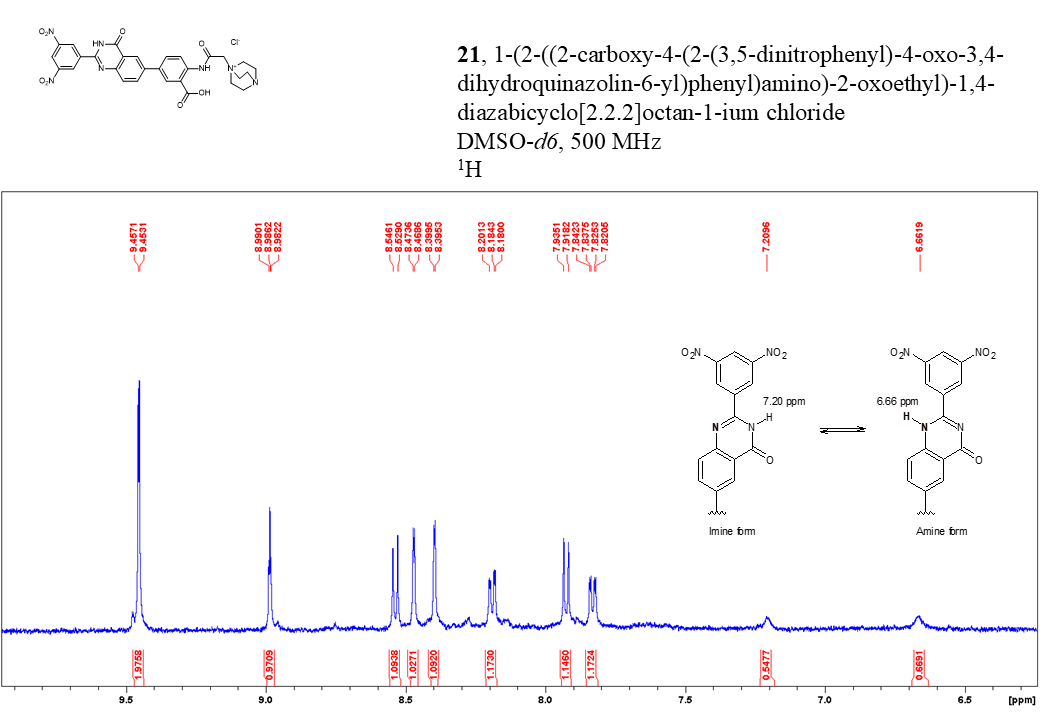


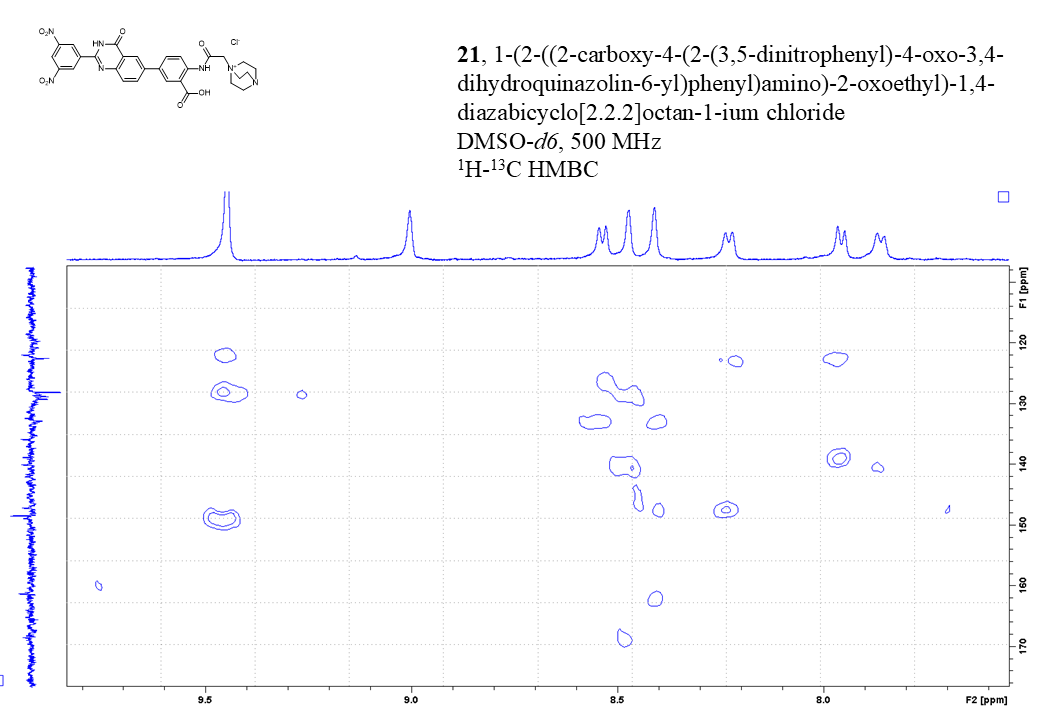

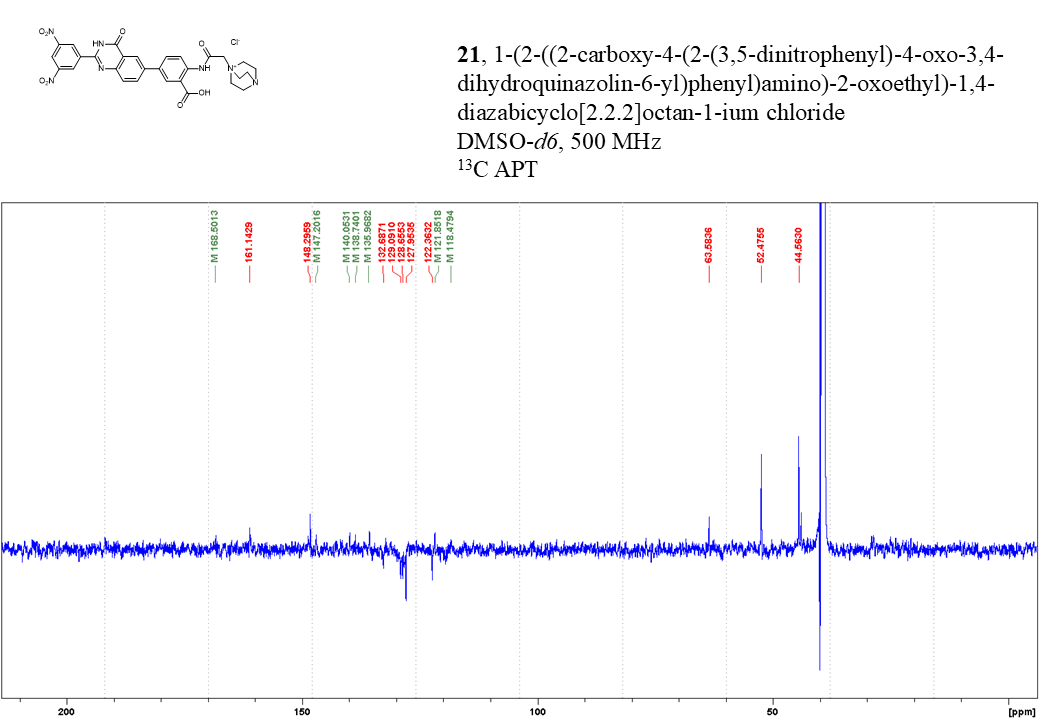

Supplement: Supplementary file 1 [file 0918d32a0b42c8d6dd4852fd.docx]
